# Supplementary material for: Insights into the Genome Sequence ofChromobacterium amazonenseIsolated from a Tropical Freshwater Lake
Source: Hindawi journal article supplement (doi:10.1155/2018/1062716), 2018-01-01
Supplement: f1 [file 1062716.f1.pdf]

**Table S1.** Misassembly report based on the alignment of *C. amazonense* strain 56AF, extracted from QUAST.

|                                 |      |
|---------------------------------|------|
| Misassemblies                   | 0    |
| Relocations                     | 0    |
| Translocations                  | 0    |
| Inversions                      | 0    |
| Misassembled contigs            | 0    |
| Misassembled contig length      | 0    |
| Local misassemblies             | 1    |
| Scaffold gap size misassemblies | 0    |
| Indels                          | 1194 |
| Short indels                    | 59   |
| Long indels                     | 59   |
| Indels length                   | 74   |

**Table S2.** Phages present in the genome of *C. amazonense* strain 56AF.

| Size Kb) | Completness  | Possible phage  | CDS (n) | Score | Location        | Access number |
|----------|--------------|-----------------|---------|-------|-----------------|---------------|
| 22.3     | Intact       | Mannhe_VB_MhM   | 25      | 140   | 223399-245719   | NC028766      |
| 24       | Questionable | Burkho_BcepMU   | 27      | 70    | 298005-322006   | NC005882      |
| 42.9     | Intact       | Ralsto RSY1     | 38      | 100   | 9932300-1035214 | NC025115      |
| 24.1     | Intact       | BurKho KS9      | 26      | 140   | 1175203-1199347 | NC013055      |
| 6.5      | Incomplete   | Entero 186      | 7       | 60    | 1233457-1240011 | NC001317      |
| 31.5     | Intact       | Ralsto RS 138   | 33      | 120   | 1853482-1885064 | NC029107      |
| 10.6     | Intact       | Stx2 converting | 11      | 110   | 2058319-2068998 | NC011357      |
| 18.1     | Intact       | Ralsto RSB2     | 19      | 100   | 2394605-2412770 | NC023736      |
| 12.9     | Incomplete   | Escher HK 639   | 20      | 20    | 4266813-4279731 | NC016158      |
| 75.5     | Intact       | Shigel sfIV     | 109     | 150   | 4304439-4379944 | NC022749      |

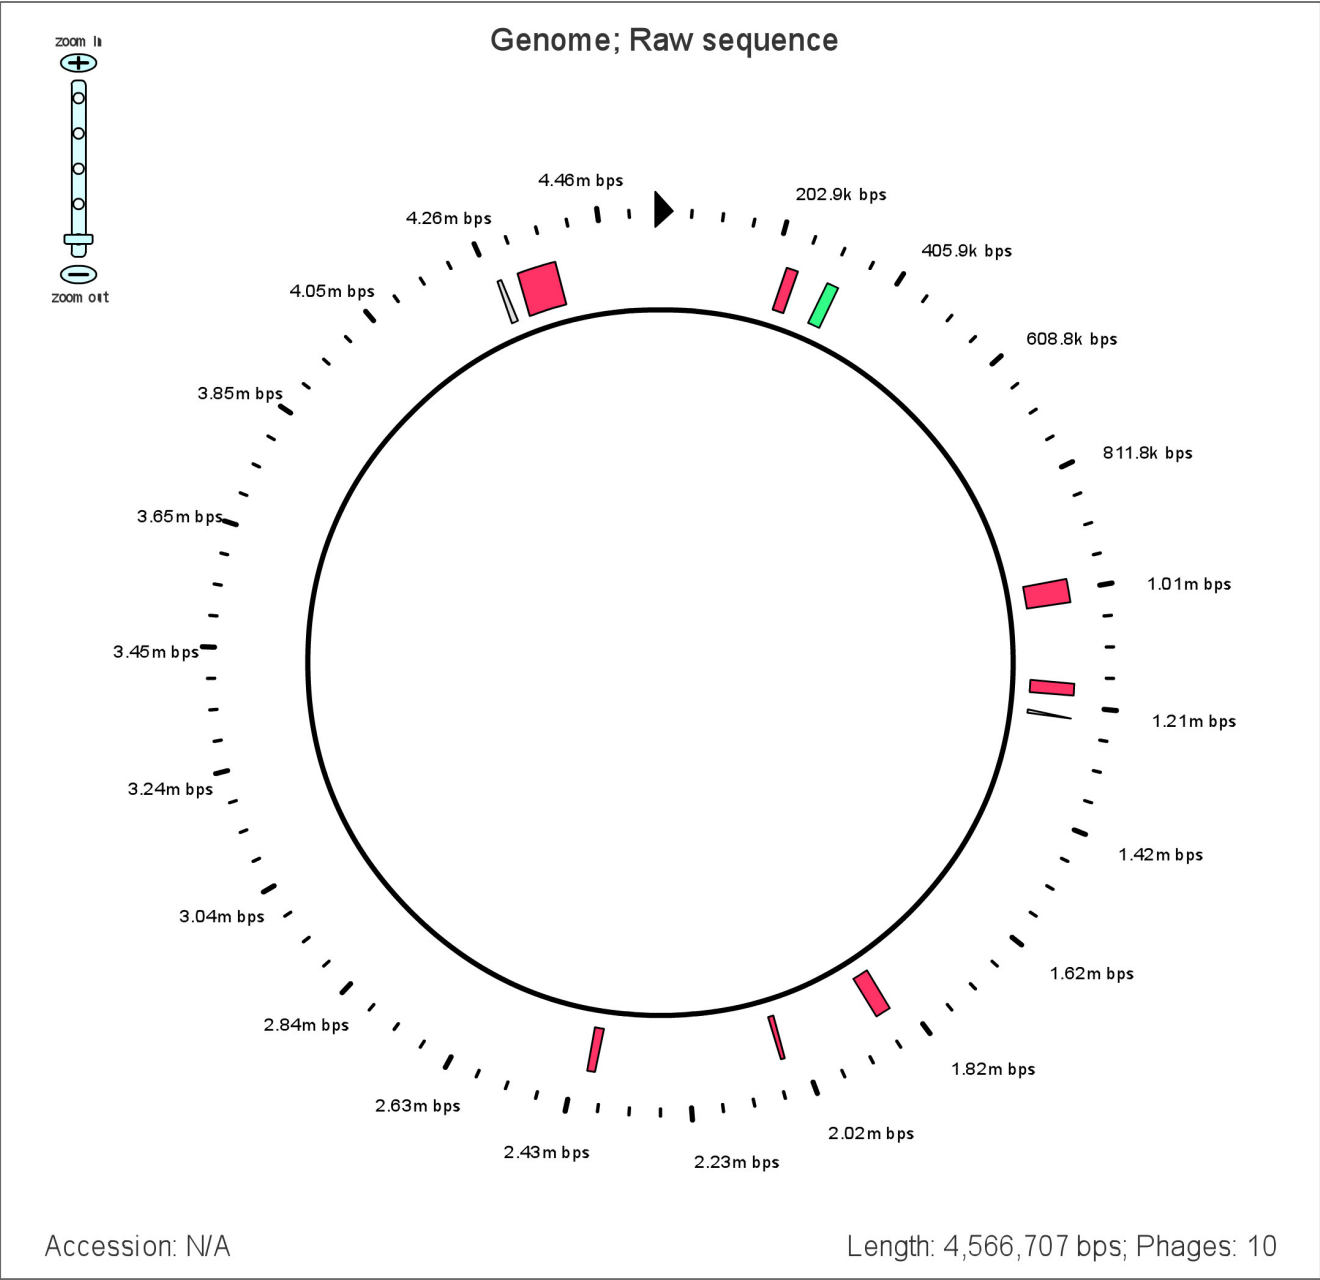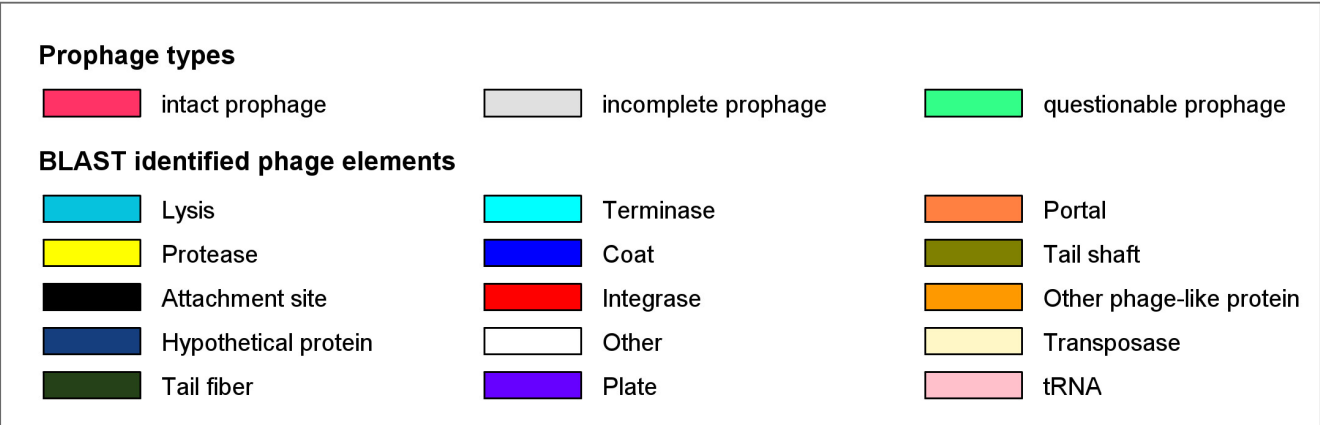

| VFDB accession number      | Gene product description                                                                                                                                                                              | Chromobacterium amazonense 564F predicted gene |
|----------------------------|-------------------------------------------------------------------------------------------------------------------------------------------------------------------------------------------------------|------------------------------------------------|
| VFG000031[gb NP_878988]    | [bplH] putative glycosyl transferase [LPS [VF0033]] [Bordetella pertussis Tohama I]                                                                                                                   | c_amazonense.gapfilled_200_mauve.fasta.3615    |
| VFG000034[gb NP_878991]    | [bplE] probable glycosyl transferase [LPS [VF0033]] [Bordetella pertussis Tohama I]                                                                                                                   | c_amazonense.gapfilled_200_mauve.fasta.3613    |
| VFG000048[gb NP_880888]    | [bscN] ATP synthase in type III secretion system [TTSS [VF0035]] [Bordetella pertussis Tohama I]                                                                                                      | c_amazonense.gapfilled_200_mauve.fasta.547     |
| VFG000077[gb NP_465991]    | [clpP] ATP-dependent Clp protease proteolytic subunit [ClpP [VF0074]] [Listeria monocytogenes EGD-e]                                                                                                  | c_amazonense.gapfilled_200_mauve.fasta.1612    |
| VFG000079[gb NP_463763]    | [clpC] endopeptidase Clp ATP-binding chain C [ClpC [VF0072]] [Listeria monocytogenes EGD-e]                                                                                                           | c_amazonense.gapfilled_200_mauve.fasta.3253    |
| VFG000099[gb NP_230484]    | [tceP] toxin co-regulated pilus biosynthesis protein E [TCP [VF0126]] [Vibrio cholerae O1 biovar El Tor str. N16961]                                                                                  | c_amazonense.gapfilled_200_mauve.fasta.4213    |
| VFG000104[gb NP_230488]    | [acB] accessory colonization factor AcfB [ACF [VF0127]] [Vibrio cholerae O1 biovar El Tor str. N16961]                                                                                                | c_amazonense.gapfilled_200_mauve.fasta.744     |
| VFG000112[gb NP_253216]    | [pilB] type 4 fimbrial biogenesis protein PilB [Type IV pili [VF0082]] [Pseudomonas aeruginosa PAO1]                                                                                                  | c_amazonense.gapfilled_200_mauve.fasta.3405    |
| VFG000119[gb NP_253948]    | [algR] alginate biosynthesis regulatory protein AlgR [Alginate [VF0091]] [Pseudomonas aeruginosa PAO1]                                                                                                | c_amazonense.gapfilled_200_mauve.fasta.1262    |
| VFG000121[gb NP_249453]    | [algU] alginate biosynthesis protein AlgZ/FimS [Alginate [VF0091]] [Pseudomonas aeruginosa PAO1]                                                                                                      | c_amazonense.gapfilled_200_mauve.fasta.2172    |
| VFG000151[gi 15596627]     | [lasR] transcriptional regulator LasR [Quorum sensing [VF0093]] [Pseudomonas aeruginosa PAO1]                                                                                                         | c_amazonense.gapfilled_200_mauve.fasta.268     |
| VFG000259[gb NP_273145]    | [flgA] capsule polysaccharide modification protein LipA [Capsule [VF0079]] [Neisseria meningitidis MC58]                                                                                              | c_amazonense.gapfilled_200_mauve.fasta.429     |
| VFG000313[gb NP_207965]    | [glpP] glucose/galactose transporter [LPS [VF0055]] [Helicobacter pylori 26695]                                                                                                                       | c_amazonense.gapfilled_200_mauve.fasta.478     |
| VFG000322[gb NP_206846]    | [wbcJ] GDP fucose synthase [LPS [VF0056]] [Helicobacter pylori 26695]                                                                                                                                 | c_amazonense.gapfilled_200_mauve.fasta.3531    |
| VFG000477[gi 16766230]     | [rpoS] sigma S (sigma 38) factor of RNA polymerase, major sigma factor during stationary phase [RpoS [VF0112]] [Salmonella enterica subsp. enterica serovar Typhimurium str. LTZ]                     | c_amazonense.gapfilled_200_mauve.fasta.3265    |
| VFG000478[gi 16764063]     | [fur] transcriptional repressor of iron-responsive genes (Fur family) (ferric uptake regulator) [Fur [VF0113]] [Salmonella enterica subsp. enterica serovar Typhimurium str. LTZ]                     | c_amazonense.gapfilled_200_mauve.fasta.2732    |
| VFG000607[gb NP_706258]    | [gtbB] bactoprenol glycosyl transferase [LPS [VF0124]] [Shigella flexneri 2a str. 301]                                                                                                                | c_amazonense.gapfilled_200_mauve.fasta.1081    |
| VFG000607[gb NP_706258]    | [gtbB] bactoprenol glycosyl transferase [LPS [VF0124]] [Shigella flexneri 2a str. 301]                                                                                                                | c_amazonense.gapfilled_200_mauve.fasta.605     |
| VFG000700[gb AAFA42192]    | [bsc1] bifunctional ribulose 5-phosphate reductase CDP-ribitol pyrophosphorylase [Capsule [VF0043]] [Haemophilus influenzae str. 1007]                                                                | c_amazonense.gapfilled_200_mauve.fasta.3162    |
| VFG000705[gb AAFA42197]    | [hscB] capsular polysaccharide export protein HscB [Capsule [VF0043]] [Haemophilus influenzae str. 1007]                                                                                              | c_amazonense.gapfilled_200_mauve.fasta.428     |
| VFG000751[gb YP_002332159] | [bfpB] BfpB secretin [BFP [VF0174]] [Escherichia coli O127:H6 str. E2348/69]                                                                                                                          | c_amazonense.gapfilled_200_mauve.fasta.1864    |
| VFG000752[gb YP_002332160] | [bfpC] BfpC, bitopic inner membrane protein [BFP [VF0174]] [Escherichia coli O127:H6 str. E2348/69]                                                                                                   | c_amazonense.gapfilled_200_mauve.fasta.1863    |
| VFG000755[gb YP_002332163] | [bfpE] BfpE, polytopic inner membrane protein [BFP [VF0174]] [Escherichia coli O127:H6 str. E2348/69]                                                                                                 | c_amazonense.gapfilled_200_mauve.fasta.1860    |
| VFG000756[gb BAAB48485]    | [bfpF] retraction ATPase BfpF [BFP [VF0174]] [Escherichia coli B171]                                                                                                                                  | c_amazonense.gapfilled_200_mauve.fasta.1859    |
| VFG000930[gb NP_753504]    | [entF] enterobactin synthase multicomplex component, ATP-dependent [Enterobactin [VF0228]] [Escherichia coli CF7073]                                                                                  | c_amazonense.gapfilled_200_mauve.fasta.500     |
| VFG001214[gb NP_253237]    | [pilR1] two-component response regulator PilR [Type IV pili [VF0082]] [Pseudomonas aeruginosa PAO1]                                                                                                   | c_amazonense.gapfilled_200_mauve.fasta.853     |
| VFG001214[gb NP_253237]    | [pilR] two-component response regulator PilR [Type IV pili [VF0082]] [Pseudomonas aeruginosa PAO1]                                                                                                    | c_amazonense.gapfilled_200_mauve.fasta.3762    |
| VFG001214[gb NP_253237]    | [pilR] two-component response regulator PilR [Type IV pili [VF0082]] [Pseudomonas aeruginosa PAO1]                                                                                                    | c_amazonense.gapfilled_200_mauve.fasta.3924    |
| VFG001214[gb NP_253237]    | [pilR] two-component response regulator PilR [Type IV pili [VF0082]] [Pseudomonas aeruginosa PAO1]                                                                                                    | c_amazonense.gapfilled_200_mauve.fasta.906     |
| VFG001269[gb NP_879579]    | [cyaB] cycloysin secretion ATP-binding protein [Cya [VF0028]] [Bordetella pertussis Tohama I]                                                                                                         | c_amazonense.gapfilled_200_mauve.fasta.1926    |
| VFG001269[gb NP_879579]    | [cyaB] cycloysin secretion ATP-binding protein [Cya [VF0028]] [Bordetella pertussis Tohama I]                                                                                                         | c_amazonense.gapfilled_200_mauve.fasta.517     |
| VFG001448[gb AAA21682]     | [kpsD] KpsD [K1 capsule [VF0239]] [Escherichia coli O18:K1:H7 str. RS218]                                                                                                                             | c_amazonense.gapfilled_200_mauve.fasta.436     |
| VFG001449[gb AAA24047]     | [kpsT] KpsT [K1 capsule [VF0239]] [Escherichia coli O18:K1:H7 str. RS218]                                                                                                                             | c_amazonense.gapfilled_200_mauve.fasta.438     |
| VFG001450[gb AAA24046]     | [kpsM] KpsM [K1 capsule [VF0239]] [Escherichia coli O18:K1:H7 str. RS218]                                                                                                                             | c_amazonense.gapfilled_200_mauve.fasta.439     |
| VFG001857[gb YP_094782]    | [iraB] di/tripeptide permease [IraAB [VF0293]] [Legionella pneumophila subsp. pneumophila str. Philadelphia 1]                                                                                        | c_amazonense.gapfilled_200_mauve.fasta.3332    |
| VFG001861[gb YP_094248]    | [katA] catalase/(hydro)peroxidase [KatAB [VF0168]] [Legionella pneumophila subsp. pneumophila str. Philadelphia 1]                                                                                    | c_amazonense.gapfilled_200_mauve.fasta.2372    |
| VFG001867[gb NP_096960]    | [sodB] superoxide dismutase [SodB [VF0169]] [Legionella pneumophila subsp. pneumophila str. Philadelphia 1]                                                                                           | c_amazonense.gapfilled_200_mauve.fasta.1807    |
| VFG001965[gb NP_282578]    | [C14317c] aminotransferase [Capsule [VF0329]] [Campylobacter jejuni subsp. jejuni NCTC 11168]                                                                                                         | c_amazonense.gapfilled_200_mauve.fasta.500     |
| VFG001990[gb YP_094942]    | [flaB] flagellar basal body P-ring biosynthesis protein FlgB [Flagella [VF0157]] [Legionella pneumophila subsp. pneumophila str. Philadelphia 1]                                                      | c_amazonense.gapfilled_200_mauve.fasta.1214    |
| VFG002218[gb NP_541012]    | [virB11] type IV secretion system protein ATPase VirB11 [VIR type IV secretion system [VF0365]] [Brucella melitensis bv. 1 str. 16M]                                                                  | c_amazonense.gapfilled_200_mauve.fasta.4204    |
| VFG002268[gb NP_034271]    | [trwE] Trw type IV secretion system VirB10 homolog, trwE protein [Trw type IV secretion system [VF0372]] [Bartonella henselae str. Houston-1]                                                         | c_amazonense.gapfilled_200_mauve.fasta.4205    |
| VFG002420[gb NP_644838]    | [adsA] Adenosine synthase A [AdsA [VF0422]] [Staphylococcus aureus subsp. aureus MW2]                                                                                                                 | c_amazonense.gapfilled_200_mauve.fasta.2516    |
| VFG002420[gb NP_644838]    | [adsA] Adenosine synthase A [AdsA [VF0422]] [Staphylococcus aureus subsp. aureus MW2]                                                                                                                 | c_amazonense.gapfilled_200_mauve.fasta.2776    |
| VFG002501[gb NP_106857]    | [fliG] flagellar motor switch protein G [Flagella [VF0430]] [Burkholderia pseudomallei K96243]                                                                                                        | c_amazonense.gapfilled_200_mauve.fasta.2566    |
| VFG002519[gb NP_109887]    | [fliA] flagellar biosynthesis sigma factor [Flagella [VF0430]] [Burkholderia pseudomallei K96243]                                                                                                     | c_amazonense.gapfilled_200_mauve.fasta.913     |
| VFG002550[gb YP_109386]    | [wcbP] capsular polysaccharide biosynthesis dehydrogenase/reductase [Capsule I [VF0436]] [Burkholderia pseudomallei K96243]                                                                           | c_amazonense.gapfilled_200_mauve.fasta.582     |
| VFG002679[gi 16122052]     | [flgC] flagellar basal body rod protein [Flagella (cluster I) [CVF039]] [Yersinia pestis CO92]                                                                                                        | c_amazonense.gapfilled_200_mauve.fasta.2360    |
| VFG002705[gi 16123821]     | [ddhD] CDP-6-deoxy-4,3-d-glucose reductase [O-antigen [CVF043]] [Yersinia pestis CO92]                                                                                                                | c_amazonense.gapfilled_200_mauve.fasta.3361    |
| VFG002901[gi 108808062]    | [YPA_2067] histidine transport system permease protein HisQ [O-antigen [CVF043]] [Yersinia pestis Antiqua]                                                                                            | c_amazonense.gapfilled_200_mauve.fasta.2422    |
| VFG002901[gi 108808062]    | [YPA_2067] histidine transport system permease protein HisQ [O-antigen [CVF043]] [Yersinia pestis Antiqua]                                                                                            | c_amazonense.gapfilled_200_mauve.fasta.2519    |
| VFG002901[gi 108808062]    | [YPA_2067] histidine transport system permease protein HisQ [O-antigen [CVF043]] [Yersinia pestis Antiqua]                                                                                            | c_amazonense.gapfilled_200_mauve.fasta.2520    |
| VFG002901[gi 108808062]    | [YPA_2067] histidine transport system permease protein HisQ [O-antigen [CVF043]] [Yersinia pestis Antiqua]                                                                                            | c_amazonense.gapfilled_200_mauve.fasta.3148    |
| VFG002901[gi 108808062]    | [YPA_2067] histidine transport system permease protein HisQ [O-antigen [CVF043]] [Yersinia pestis Antiqua]                                                                                            | c_amazonense.gapfilled_200_mauve.fasta.3550    |
| VFG002901[gi 108808062]    | [YPA_2067] histidine transport system permease protein HisQ [O-antigen [CVF043]] [Yersinia pestis Antiqua]                                                                                            | c_amazonense.gapfilled_200_mauve.fasta.712     |
| VFG002901[gi 108808062]    | [YPA_2067] histidine transport system permease protein HisQ [O-antigen [CVF043]] [Yersinia pestis Antiqua]                                                                                            | c_amazonense.gapfilled_200_mauve.fasta.713     |
| VFG002901[gi 108808062]    | [YPA_2067] histidine transport system permease protein HisQ [O-antigen [CVF043]] [Yersinia pestis Antiqua]                                                                                            | c_amazonense.gapfilled_200_mauve.fasta.97      |
| VFG003393[gi 1595350]      | [ddhB] CDP-glucose 4,6-dehydratase [O-antigen [CVF043]] [Yersinia pseudotuberculosis IP 32953]                                                                                                        | c_amazonense.gapfilled_200_mauve.fasta.3451    |
| VFG003394[gi 1595351]      | [ddhC] putative CDP-4-keto-6-deoxy-D-glucose-3-dehydratase [O-antigen [CVF043]] [Yersinia pseudotuberculosis IP 32953]                                                                                | c_amazonense.gapfilled_200_mauve.fasta.3532    |
| VFG003413[gi 1596047]      | [fliS] flagellar protein Flis [Flagella (cluster I) [CVF039]] [Yersinia pseudotuberculosis IP 32953]                                                                                                  | c_amazonense.gapfilled_200_mauve.fasta.3433    |
| VFG003433[gi 1596013]      | [fliG] flagellar basal-body rod protein Flig (distal rod protein) [Flagella (cluster I) [CVF039]] [Yersinia pseudotuberculosis IP 32953]                                                              | c_amazonense.gapfilled_200_mauve.fasta.2356    |
| VFG003636[gi 16761645]     | [orgC] hypothetical protein found within S. typhi pathogenicity island 1 [TTSS (SPI-1 encode) [CVF031]] [Salmonella enterica subsp. enterica serovar Typhi str. CT18]                                 | c_amazonense.gapfilled_200_mauve.fasta.1717    |
| VFG003668[gi 16414826]     | [prnH] pathogenicity I island effector protein [TTSS (SPI-1 encode) [CVF031]] [Salmonella enterica subsp. enterica serovar Paratyphi A str. ATCC 9150]                                                | c_amazonense.gapfilled_200_mauve.fasta.1722    |
| VFG003728[gi 16414833]     | [prnG] type III secretion protein [TTSS (SPI-1 encode) [CVF031]] [Salmonella enterica subsp. enterica serovar Paratyphi A str. ATCC 9150]                                                             | c_amazonense.gapfilled_200_mauve.fasta.1722    |
| VFG003916[gi 16759521]     | [fmfE] probable transcriptional regulator [FimZK regulator [Fim [VF003]] [Salmonella enterica subsp. enterica serovar Typhi str. CT18]                                                                | c_amazonense.gapfilled_200_mauve.fasta.2037    |
| VFG004379[gi 16767813]     | [stB] putative fimbrial usher protein [StB [AO067]] [Salmonella enterica subsp. enterica serovar Typhimurium str. LTZ]                                                                                | c_amazonense.gapfilled_200_mauve.fasta.1324    |
| VFG005051[gi 13661373]     | [SSP0064] putative glycosyltransferase [Capsule [CVF110]] [Staphylococcus saprophyticus subsp. saprophyticus ATCC 15305]                                                                              | c_amazonense.gapfilled_200_mauve.fasta.3536    |
| VFG005341[gi 15674453]     | [plr/gapA] glyceraldehyde 3-phosphate dehydrogenase [Streptococcal plasmin receptor/GAPDH [CVF123]] [Streptococcus pyogenes M1 GAS]                                                                   | c_amazonense.gapfilled_200_mauve.fasta.84      |
| VFG005356[gi 11651642]     | [plr/gapA] glyceraldehyde 3-phosphate dehydrogenase, type I [Streptococcal plasmin receptor/GAPDH [CVF123]] [Streptococcus pneumoniae D39]                                                            | c_amazonense.gapfilled_200_mauve.fasta.448     |
| VFG005535[gi 17911425]     | [tig/ropA] trigger factor [Trigger factor [CVF149]] [Streptococcus pyogenes MGAS5005]                                                                                                                 | c_amazonense.gapfilled_200_mauve.fasta.1611    |
| VFG005582[gi 125717729]    | [eno] Enolase, putative [Streptococcal enolase [CVF153]] [Streptococcus sanguinis SK36]                                                                                                               | c_amazonense.gapfilled_200_mauve.fasta.3010    |
| VFG005767[gb NP_687682]    | [cylG] 3-ketoacyl-ACP-reductase CylG [Beta-hemolysin/cytolysin [CVF171]] [Streptococcus agalactiae 2603V/R]                                                                                           | c_amazonense.gapfilled_200_mauve.fasta.2964    |
| VFG005997[gi 24379858]     | [rmlA] putative glucose-1-phosphate thymidyltransferase [Capsule [CVF186]] [Streptococcus mutans UA159]                                                                                               | c_amazonense.gapfilled_200_mauve.fasta.3521    |
| VFG006021[gi 59800790]     | [pilT2] putative twitching motility-like protein [GC pili [AO061]] [Neisseria gonorrhoeae FA 1090]                                                                                                    | c_amazonense.gapfilled_200_mauve.fasta.75      |
| VFG006242[gi 121635698]    | [porB] porin, major outer membrane protein P.1 [PorB [CVF195]] [Neisseria meningitidis FAM18]                                                                                                         | c_amazonense.gapfilled_200_mauve.fasta.1512    |
| VFG006242[gi 121635698]    | [porB] porin, major outer membrane protein P.1 [PorB [CVF195]] [Neisseria meningitidis FAM18]                                                                                                         | c_amazonense.gapfilled_200_mauve.fasta.2535    |
| VFG006255[gi 59800669]     | [rpoB] ABC transporter, ATP-binding protein, iron related [ABC transporter [CVF197]] [Neisseria gonorrhoeae FA 1090]                                                                                  | c_amazonense.gapfilled_200_mauve.fasta.2581    |
| VFG006259[gi 59800668]     | [rpoB] ABC transporter, ATP-binding protein, iron related [ABC transporter [CVF197]] [Neisseria gonorrhoeae FA 1090]                                                                                  | c_amazonense.gapfilled_200_mauve.fasta.2421    |
| VFG006259[gi 59800668]     | [rpoB] ABC transporter, ATP-binding protein, iron related [ABC transporter [CVF197]] [Neisseria gonorrhoeae FA 1090]                                                                                  | c_amazonense.gapfilled_200_mauve.fasta.336     |
| VFG006259[gi 59800668]     | [rpoB] ABC transporter, ATP-binding protein, iron related [ABC transporter [CVF197]] [Neisseria gonorrhoeae FA 1090]                                                                                  | c_amazonense.gapfilled_200_mauve.fasta.98      |
| VFG006288[gi 15794866]     | [exdB] biopolymer transport protein [Ton system [CVF202]] [Neisseria meningitidis Z2491]                                                                                                              | c_amazonense.gapfilled_200_mauve.fasta.290     |
| VFG006295[gi 59801725]     | [exd] Exd [Ton system [CVF202]] [Neisseria gonorrhoeae FA 1090]                                                                                                                                       | c_amazonense.gapfilled_200_mauve.fasta.3893    |
| VFG006392[gi 15611540]     | [cagS] cag island protein, DNA transfer protein [Cag PAI type IV secretion system [CVF217]] [Helicobacter pylori J99]                                                                                 | c_amazonense.gapfilled_200_mauve.fasta.4202    |
| VFG006719[gi 16800743]     | [lap] hypothetical protein [Listeria adhesion protein [CVF228]] [Listeria innocua Clip11262]                                                                                                          | c_amazonense.gapfilled_200_mauve.fasta.1063    |
| VFG006813[gi 116873279]    | [lspA] lipoprotein signal peptidase [Lipoprotein-specific signal peptidase II [CVF249]] [Listeria welshimeri serovar 6b str. SLCCS334]                                                                | c_amazonense.gapfilled_200_mauve.fasta.3093    |
| VFG006892[gi 147673778]    | [acB] accessory colonization factor AcfB [Accessory colonization factor [CVF257]] [Vibrio cholerae O395]                                                                                              | c_amazonense.gapfilled_200_mauve.fasta.1009    |
| VFG006948[gi 37681131]     | [mshJ] MSHA biogenesis protein MshJ [Mannose-sensitive hemagglutinin (MSHA type IV pilus) [CVF259]] [Vibrio vulnificus YJ016]                                                                         | c_amazonense.gapfilled_200_mauve.fasta.4274    |
| VFG006967[gi 59710969]     | [mshE] type 4 fimbrial assembly protein PilB [Mannose-sensitive hemagglutinin (MSHA type IV pilus) [CVF259]] [Vibrio fisheri ES114]                                                                   | c_amazonense.gapfilled_200_mauve.fasta.4277    |
| VFG007025[gi 17366166]     | [rtxB] ABC-type bacteriocin/fimbriolysin [RTX toxin [CVF263]] [Vibrio vulnificus CMCP6]                                                                                                               | c_amazonense.gapfilled_200_mauve.fasta.3567    |
| VFG007026[gi 37676694]     | [rtxB] RTX toxin transporter [RTX toxin [CVF263]] [Vibrio vulnificus YJ016]                                                                                                                           | c_amazonense.gapfilled_200_mauve.fasta.516     |
| VFG007033[gi 15600987]     | [tth] thermolabile hemolysin [Thermolabile hemolysin [CVF265]] [Vibrio cholerae O1 biovar El Tor str. N16961]                                                                                         | c_amazonense.gapfilled_200_mauve.fasta.242     |
| VFG007274[gi 15642208]     | [viuB] vibriobactin utilization protein ViuB [Vibriobactin utilization [CVF275]] [Vibrio cholerae O1 biovar El Tor str. N16961]                                                                       | c_amazonense.gapfilled_200_mauve.fasta.1765    |
| VFG007406[gi 15642121]     | [fliQ] flagellar biosynthesis protein [Flagella [VF0519]] [Vibrio cholerae O1 biovar El Tor str. N16961]                                                                                              | c_amazonense.gapfilled_200_mauve.fasta.2445    |
| VFG007481[gi 27365279]     | [fliE] flagellar hook-basal body protein [Flagella [CVF281]] [Vibrio vulnificus CMCP6]                                                                                                                | c_amazonense.gapfilled_200_mauve.fasta.2568    |
| VFG007486[gi 28899025]     | [fliC] FlaM [Flagella [CVF281]] [Vibrio parahaemolyticus RIMD 2210633]                                                                                                                                | c_amazonense.gapfilled_200_mauve.fasta.2569    |
| VFG007547[gi 27365304]     | [cheW] Chemotaxis signal transduction protein [Flagella [CVF281]] [Vibrio vulnificus CMCP6]                                                                                                           | c_amazonense.gapfilled_200_mauve.fasta.897     |
| VFG007662[gi 37678486]     | [rmlD] dTDP-4-dehydrohamnose reductase [Capsular polysaccharide [CVF282]] [Vibrio vulnificus YJ016]                                                                                                   | c_amazonense.gapfilled_200_mauve.fasta.3520    |
| VFG007663[gi 37678487]     | [rmlC] dTDP-6-deoxy-D-xyl-4-hexulose-3-epimerase [Capsular polysaccharide [CVF282]] [Vibrio vulnificus YJ016]                                                                                         | c_amazonense.gapfilled_200_mauve.fasta.3522    |
| VFG007914[gi 120404101]    | [ddrA] daunorubicin resistance ABC transporter ATPase subunit [PDIM [phthiocerol dimycoserate] and PGL [phenolic glycolipid] biosynthesis and transport [CVF288]] [Mycobacterium vanbaalenii PPR-1]   | c_amazonense.gapfilled_200_mauve.fasta.2009    |
| VFG007914[gi 120404101]    | [ddrA] daunorubicin resistance ABC transporter ATPase subunit [PDIM [phthiocerol dimycoserate] and PGL [phenolic glycolipid] biosynthesis and transport [CVF288]] [Mycobacterium vanbaalenii PPR-1]   | c_amazonense.gapfilled_200_mauve.fasta.2903    |
| VFG008680[gi 43364447]     | [ddrA] daunorubicin resistance ABC transporter ATP-binding subunit [PDIM [phthiocerol dimycoserate] and PGL [phenolic glycolipid] biosynthesis and transport [CVF288]] [Mycobacterium smegmatis J652] | c_amazonense.gapfilled_200_mauve.fasta.1337    |
| VFG008788[gi 43362859]     | [msbA] Mycosurfactant acid synthase [PDIM [phthiocerol dimycoserate] and PGL [phenolic glycolipid] biosynthesis and transport [CVF288]] [Mycobacterium canettii CIFT 14006008]                        | c_amazonense.gapfilled_200_mauve.fasta.384     |
| VFG009135[gi 383308045]    | [kasB] 3-oxoacyl-(acyl carrier protein) synthase II [FAS-II [CVF300]] [Mycobacterium tuberculosis H37R327]                                                                                            | c_amazonense.gapfilled_200_mauve.fasta.2971    |
| VFG009305[gi 119870876]    | [pntA] pantotate-beta-alanine ligase [Pantothenate synthetase [CVF305]] [Mycobacterium sp. KMS]                                                                                                       | c_amazonense.gapfilled_200_mauve.fasta.1431    |
| VFG009331[gi 118471351]    | [purC] phosphoribosylaminimidazole-succinocarboxamide synthase [Purine synthesis [CVF306]] [Mycobacterium smegmatis str. MC2 155]                                                                     | c_amazonense.gapfilled_200_mauve.fasta.56      |
| VFG009376[gi 118470522]    | [leuD] 3-isopropylmalate dehydratase, small subunit [Lucine synthesis [CVF309]] [Mycobacterium smegmatis str. MC2 155]                                                                                | c_amazonense.gapfilled_200_mauve.fasta.2259    |
| VFG009407[gi 145223515]    | [glnA1] glutamine synthetase, type I [Glutamine synthesis [CVF311]] [Mycobacterium gilvum PPR-GCK]                                                                                                    | c_amazonense.gapfilled_200_mauve.fasta.3113    |
| VFG009865[gi 120405794]    | [mprA] two component transcriptional regulator, winged helix family [MprA/B [CVF333]] [Mycobacterium vanbaalenii PPR-1]                                                                               | c_amazonense.gapfilled_200_mauve.fasta.130     |
| VFG009865[gi 120405794]    | [mprA] two component transcriptional regulator, winged helix family [MprA/B [CVF333]] [Mycobacterium vanbaalenii PPR-1]                                                                               | c_amazonense.gapfilled_200_mauve.fasta.1391    |
| VFG009921[gi 15842122]     | [relA] GTP pyrophosphokinase [[pppGpp synthesis and hydrolysis [CVF335]] [Mycobacterium tuberculosis CDC1551]                                                                                         | c_amazonense.gapfilled_200_mauve.fasta.3345    |
| VFG010484[gi 54296712]     | [htpB] 60 kDa chaperonin (Protein Cpn60)[groEL protein]/Heat shock protein B. [Hsp60 [CVF347]] [Legionella pneumophila str. Paris]                                                                    | c_amazonense.gapfilled_200_mauve.fasta.3523    |
| VFG010515[gb YP_095205]    | [lidI] Dot/Icm type IV secretion system effector LidI [Dot/Icm [SSO47]] [Legionella pneumophila subsp. pneumophila str. Philadelphia 1]                                                               | c_amazonense.gapfilled_200_mauve.fasta.44      |
| VFG010782[gi 52841485]     | [virB5] LvhB5 [Lvh TASSA [SSO48]] [Legionella pneumophila subsp. pneumophila str. Philadelphia 1]                                                                                                     | c_amazonense.gapfilled_200_mauve.fasta.4264    |
| VFG010904[gi 54293730]     | [iraB] di/tripeptide transporter homolog IraB [Iron acquisition/assimilation locus [CVF361]] [Legionella pneumophila str. Lens]                                                                       | c_amazonense.gapfilled_200_mauve.fasta.1083    |
| VFG010904[gi 54293730]     | [iraB] di/tripeptide transporter homolog IraB [Iron acquisition/assimilation locus [CVF361]] [Legionella pneumophila str. Lens]                                                                       | c_amazonense.gapfilled_200_mauve.fasta.384     |
| VFG011154[gi 115421194]    | [bpgG] probable sugar transferase [LPS [CVF380]] [Bordetella avium 197N]                                                                                                                              | c_amazonense.gapfilled_200_mauve.fasta.3611    |
| VFG011157[gi 33599142]     | [bplF] lipopolysaccharide biosynthesis protein [LPS [CVF380]] [Bordetella bronchiseptica RB50]                                                                                                        | c_amazonense.gapfilled_200_mauve.fasta.3612    |
| VFG011157[gi 33599142]     | [bplF] lipopolysaccharide biosynthesis protein [LPS [CVF380]] [Bordetella bronchiseptica RB50]                                                                                                        | c_amazonense.gapfilled_200_mauve.fasta.606     |
| VFG011167[gi 33594872]     | [bplC] lipopolysaccharide biosynthesis protein [LPS [CVF380]] [Bordetella parapertussis 12822]                                                                                                        | c_amazonense.gapfilled_200_mauve.fasta.3618    |
| VFG011175[gi 33594874]     | [bplA] probable oxidoreductase [LPS [CVF380]] [Bordetella parapertussis 12822]                                                                                                                        | c_amazonense.gapfilled_200_mauve.fasta.3621    |
| VFG011255[gi 33601532]     | [fliH] flagellar biosynthetic protein FlhB [Flagella [CVF382]] [Bordetella bronchiseptica RB50]                                                                                                       | c_amazonense.gapfilled_200_mauve.fasta.917     |
| VFG011274[gi 33596137]     | [fliG] flagellar basal body rod protein [Flagella [CVF382]] [Bordetella parapertussis 12822]                                                                                                          | c_amazonense.gapfilled_200_mauve.fasta.2361    |
| VFG011317[gi 33592490]     | [fliR] flagellar biosynthetic protein FlhR [Flagella [CVF382]] [Bordetella pertussis Tohama I]                                                                                                        | c_amazonense.gapfilled_200_mauve.fasta.2554    |

|                          |                                                                                                                                                                      |                                          |
|--------------------------|----------------------------------------------------------------------------------------------------------------------------------------------------------------------|------------------------------------------|
| VFG011351[gi 33601561]   | (fliJ) flagellar protein FliJ [Flagella (CVF382)] [Bordetella bronchiseptica R850]                                                                                   | c_amazonense.gapped1200_mauve.fasta.2563 |
| VFG011355[gi 33601562]   | (fliJ) flagellar-specific ATP synthase FliJ [Flagella (CVF382)] [Bordetella bronchiseptica R850]                                                                     | c_amazonense.gapped1200_mauve.fasta.2564 |
| VFG011402[gi 23502030]   | (fabZ) (3R)-hydroxymyristoyl ACP dehydratase [LPS (CVF383)] [Brucella suis 1330]                                                                                     | c_amazonense.gapped1200_mauve.fasta.1592 |
| VFG011430[gb NP_540392]  | (acpM) acyl carrier protein [LPS (CVF383)] [Brucella melitensis bv. 1 str. 16M]                                                                                      | c_amazonense.gapped1200_mauve.fasta.2972 |
| VFG011582[gi 83269014]   | (virB9) Type IV secretion system CagX conjugation protein [Type IV secretion system (CVF385)] [Brucella melitensis biovar Abortus 2308]                              | c_amazonense.gapped1200_mauve.fasta.4206 |
| VFG011773[gi 118475094]  | (CFF8240_1403) putative heptosyltransferase III waaq [LOS (CVF396)] [Campylobacter fetus subsp. fetus 82-40]                                                         | c_amazonense.gapped1200_mauve.fasta.667  |
| VFG011805[gi 118475485]  | (CFF8240_1412) aspartate racemase [LOS (CVF396)] [Campylobacter fetus subsp. fetus 82-40]                                                                            | c_amazonense.gapped1200_mauve.fasta.102  |
| VFG011809[gi 118475685]  | (CFF8240_1413) bifunctional protein HldE [LOS (CVF396)] [Campylobacter fetus subsp. fetus 82-40]                                                                     | c_amazonense.gapped1200_mauve.fasta.368  |
| VFG012080[gi 118475230]  | (pgII) glycosyl transferase, group 1 family protein [N-linked protein glycosylation (CVF400)] [Campylobacter fetus subsp. fetus 82-40]                               | c_amazonense.gapped1200_mauve.fasta.666  |
| VFG012165[gi 11080269]   | (CPR_0433) transport protein ysiA [Hemolysin (CVF417)] [Clostridium perfringens SM101]                                                                               | c_amazonense.gapped1200_mauve.fasta.3662 |
| VFG012183[gi 150016581]  | (Cbe1_1707) hemolysin A [Hemolysin (CVF417)] [Clostridium beijerinckii NCIM8 8052]                                                                                   | c_amazonense.gapped1200_mauve.fasta.3796 |
| VFG012187[gi 28210321]   | (CTC00586) hemolysin III [Hemolysin (CVF417)] [Clostridium tetani E88]                                                                                               | c_amazonense.gapped1200_mauve.fasta.2914 |
| VFG012633[gi 26252982]   | (ireA) Putative iron-regulated outer membrane virulence protein [iron-regulated element (CVF461)] [Escherichia coli CF7073]                                          | c_amazonense.gapped1200_mauve.fasta.1319 |
| VFG012837[gi 82524546]   | (ipaH2_5) invasion plasmid antigen, fragment [Mxi-Spa TTSS effectors controlled by MxiE (CVF465)] [Shigella dysenteriae Sd197]                                       | c_amazonense.gapped1200_mauve.fasta.4033 |
| VFG012837[gi 82524546]   | (ipaH2_5) invasion plasmid antigen, fragment [Mxi-Spa TTSS effectors controlled by MxiE (CVF465)] [Shigella dysenteriae Sd197]                                       | c_amazonense.gapped1200_mauve.fasta.4046 |
| VFG012837[gi 82524546]   | (ipaH2_5) invasion plasmid antigen, fragment [Mxi-Spa TTSS effectors controlled by MxiE (CVF465)] [Shigella dysenteriae Sd197]                                       | c_amazonense.gapped1200_mauve.fasta.4118 |
| VFG012837[gi 82524546]   | (ipaH2_5) invasion plasmid antigen, fragment [Mxi-Spa TTSS effectors controlled by MxiE (CVF465)] [Shigella dysenteriae Sd197]                                       | c_amazonense.gapped1200_mauve.fasta.4122 |
| VFG012837[gi 82524546]   | (ipaH2_5) invasion plasmid antigen, fragment [Mxi-Spa TTSS effectors controlled by MxiE (CVF465)] [Shigella dysenteriae Sd197]                                       | c_amazonense.gapped1200_mauve.fasta.4144 |
| VFG012874[gi 30064027]   | (ipaH) hypothetical protein [Mxi-Spa TTSS effectors controlled by MxiE (CVF465)] [Shigella flexneri 2a str. 24571]                                                   | c_amazonense.gapped1200_mauve.fasta.110  |
| VFG013082[gi 82524781]   | (virK) VirK [VirK (CVF483)] [Shigella boydii Sb227]                                                                                                                  | c_amazonense.gapped1200_mauve.fasta.757  |
| VFG013147[gi 170719185]  | (kdsIb) 3-deoxy-D-manno-oxulosonate cytidyltransferase [LOS (CVF494)] [Haemophilus somnus 2336]                                                                      | c_amazonense.gapped1200_mauve.fasta.2916 |
| VFG013165[gi 170717703]  | (VFG012-Q-0-(3-hydroxymyristoyl) glucosamine N-acyltransferase [LOS (CVF494)] [Haemophilus somnus 2336]                                                              | c_amazonense.gapped1200_mauve.fasta.1591 |
| VFG013173[gi 170719107]  | (rfae) rfaE bifunctional protein [LOS (CVF494)] [Haemophilus somnus 2336]                                                                                            | c_amazonense.gapped1200_mauve.fasta.2476 |
| VFG013190[gi 170717479]  | (hItA) extracellular solute-binding protein family 1 [Haemophilus iron transport locus (CVF501)] [Haemophilus somnus 2336]                                           | c_amazonense.gapped1200_mauve.fasta.2334 |
| VFG013191[gi 170717477]  | (hItB) binding-protein-dependent transport systems inner membrane component [Haemophilus iron transport locus (CVF501)] [Haemophilus somnus 2336]                    | c_amazonense.gapped1200_mauve.fasta.2333 |
| VFG013192[gi 170717476]  | (hItC) ABC transporter related [Haemophilus iron transport locus (CVF501)] [Haemophilus somnus 2336]                                                                 | c_amazonense.gapped1200_mauve.fasta.1027 |
| VFG013192[gi 170717476]  | (hItC) ABC transporter related [Haemophilus iron transport locus (CVF501)] [Haemophilus somnus 2336]                                                                 | c_amazonense.gapped1200_mauve.fasta.1338 |
| VFG013192[gi 170717476]  | (hItC) ABC transporter related [Haemophilus iron transport locus (CVF501)] [Haemophilus somnus 2336]                                                                 | c_amazonense.gapped1200_mauve.fasta.2332 |
| VFG013192[gi 170717476]  | (hItC) ABC transporter related [Haemophilus iron transport locus (CVF501)] [Haemophilus somnus 2336]                                                                 | c_amazonense.gapped1200_mauve.fasta.2580 |
| VFG013192[gi 170717476]  | (hItC) ABC transporter related [Haemophilus iron transport locus (CVF501)] [Haemophilus somnus 2336]                                                                 | c_amazonense.gapped1200_mauve.fasta.2707 |
| VFG013192[gi 170717476]  | (hItC) ABC transporter related [Haemophilus iron transport locus (CVF501)] [Haemophilus somnus 2336]                                                                 | c_amazonense.gapped1200_mauve.fasta.2717 |
| VFG013192[gi 170717476]  | (hItC) ABC transporter related [Haemophilus iron transport locus (CVF501)] [Haemophilus somnus 2336]                                                                 | c_amazonense.gapped1200_mauve.fasta.3314 |
| VFG013197[gi 170717931]  | (hemB) Porphobilinogen synthase [Heme biosynthesis (CVF506)] [Haemophilus somnus 2336]                                                                               | c_amazonense.gapped1200_mauve.fasta.1444 |
| VFG013198[gi 170718229]  | (hemC) porphobilinogen deaminase [Heme biosynthesis (CVF506)] [Haemophilus somnus 2336]                                                                              | c_amazonense.gapped1200_mauve.fasta.34   |
| VFG013199[gi 170718230]  | (hemD) Uroporphyrinogen III synthase HEM4 [Heme biosynthesis (CVF506)] [Haemophilus somnus 2336]                                                                     | c_amazonense.gapped1200_mauve.fasta.35   |
| VFG013203[gi 170719024]  | (hemL) glutamate-1-semialdehyde-2,1-aminomutase [Heme biosynthesis (CVF506)] [Haemophilus somnus 2336]                                                               | c_amazonense.gapped1200_mauve.fasta.2288 |
| VFG013205[gi 170718942]  | (hemM) oxygen-independent coproporphyrinogen III oxidase [Heme biosynthesis (CVF506)] [Haemophilus somnus 2336]                                                      | c_amazonense.gapped1200_mauve.fasta.3232 |
| VFG013247[gi 113460811]  | (pgII) tetraacylsaccharide 4'-kinase (Iipid-A 4'-kinase) [LOS (CVF494)] [Haemophilus somnus 129PT]                                                                   | c_amazonense.gapped1200_mauve.fasta.2918 |
| VFG013252[gi 33152665]   | (mbaA) ABC transporter ATP-binding protein MbaA [LOS (CVF494)] [Haemophilus ducreyi 35000HP]                                                                         | c_amazonense.gapped1200_mauve.fasta.670  |
| VFG013265[gb NP_438428]  | (orfM) deoxyribonucleotide triphosphate pyrophosphatase [LOS (CVF494)] [Haemophilus influenzae Rd KW20]                                                              | c_amazonense.gapped1200_mauve.fasta.816  |
| VFG013324[gi 148827923]  | (lpwH) UDP-2,3-diacylglycosamine hydrolase [LOS (CVF494)] [Haemophilus influenzae PittG5]                                                                            | c_amazonense.gapped1200_mauve.fasta.2602 |
| VFG013384[gb NP_439218]  | (lpwB) Iipid A-disaccharide synthase [LOS (CVF494)] [Haemophilus influenzae Rd KW20]                                                                                 | c_amazonense.gapped1200_mauve.fasta.1594 |
| VFG013394[gi 113461502]  | (lpac) UDP-N-acetylglucosamine acyltransferase [LOS (CVF494)] [Haemophilus somnus 129PT]                                                                             | c_amazonense.gapped1200_mauve.fasta.1593 |
| VFG013407[gi 68249665]   | (rfad) ADP-L-glycero-D-manno-heptose-6-epimerase [LOS (CVF494)] [Haemophilus influenzae 86-028NP]                                                                    | c_amazonense.gapped1200_mauve.fasta.2474 |
| VFG013417[gi 113460510]  | (lpac) UDP-3-O-(3-hydroxymyristoyl)-N-acetylglucosamine deacetylase [LOS (CVF494)] [Haemophilus somnus 129PT]                                                        | c_amazonense.gapped1200_mauve.fasta.3836 |
| VFG013423[gi 113461381]  | (gmhA/lpCA) phosphoglycerate isomerase [LOS (CVF494)] [Haemophilus somnus 129PT]                                                                                     | c_amazonense.gapped1200_mauve.fasta.237  |
| VFG013466[gi 68249928]   | (kdsA) 2-dehydro-3-deoxyphosphoactonate aldolase [LOS (CVF494)] [Haemophilus influenzae 86-028NP]                                                                    | c_amazonense.gapped1200_mauve.fasta.3009 |
| VFG013470[gi 113461089]  | (kdsA) 2-dehydro-3-deoxyphosphoactonate aldolase [LOS (CVF494)] [Haemophilus somnus 129PT]                                                                           | c_amazonense.gapped1200_mauve.fasta.2141 |
| VFG013515[gi 148826007]  | (mrsA/glmM) predicted phosphomannomutase [Exopolysaccharide (CVF495)] [Haemophilus influenzae PittEE]                                                                | c_amazonense.gapped1200_mauve.fasta.3371 |
| VFG013530[gi 16273471]   | (pgI) glucose-6-phosphate isomerase [Exopolysaccharide (CVF495)] [Haemophilus influenzae Rd KW20]                                                                    | c_amazonense.gapped1200_mauve.fasta.18   |
| VFG013535[gi 113461081]  | (pgII) glucose-6-phosphate isomerase [Exopolysaccharide (CVF495)] [Haemophilus somnus 129PT]                                                                         | c_amazonense.gapped1200_mauve.fasta.1986 |
| VFG013539[gi 113460750]  | (manA) mannose-6-phosphate isomerase (phosphomannomannose isomerase) [Exopolysaccharide (CVF495)] [Haemophilus somnus 129PT]                                         | c_amazonense.gapped1200_mauve.fasta.1104 |
| VFG013568[gi 68248709]   | (hItB) iron(III)-transport system permease protein hfbpB [Haemophilus iron transport locus (CVF501)] [Haemophilus influenzae 86-028NP]                               | c_amazonense.gapped1200_mauve.fasta.2693 |
| VFG013573[gi 113460924]  | (hItC) iron(III) ABC transporter, ATP-binding protein [Haemophilus iron transport locus (CVF501)] [Haemophilus somnus 129PT]                                         | c_amazonense.gapped1200_mauve.fasta.1213 |
| VFG013573[gi 113460924]  | (hItC) iron(III) ABC transporter, ATP-binding protein [Haemophilus iron transport locus (CVF501)] [Haemophilus somnus 129PT]                                         | c_amazonense.gapped1200_mauve.fasta.2459 |
| VFG013607[gi 113460953]  | (hemA) glutamyl-tRNA reductase [Heme biosynthesis (CVF506)] [Haemophilus somnus 129PT]                                                                               | c_amazonense.gapped1200_mauve.fasta.3919 |
| VFG013612[gi 113461676]  | (hemE) uroporphyrinogen decarboxylase [Heme biosynthesis (CVF506)] [Haemophilus somnus 129PT]                                                                        | c_amazonense.gapped1200_mauve.fasta.1048 |
| VFG013615[gi 68249709]   | (hemH) ferrochelatase [Heme biosynthesis (CVF506)] [Haemophilus influenzae 86-028NP]                                                                                 | c_amazonense.gapped1200_mauve.fasta.1950 |
| VFG013618[gi 113461372]  | (hemL) glutamate-1-semialdehyde aminotransferase [Heme biosynthesis (CVF506)] [Haemophilus somnus 129PT]                                                             | c_amazonense.gapped1200_mauve.fasta.28   |
| VFG013629[gi 33152698]   | (hemN) coproporphyrinogen III oxidase [Heme biosynthesis (CVF506)] [Haemophilus ducreyi 35000HP]                                                                     | c_amazonense.gapped1200_mauve.fasta.817  |
| VFG013631[gi 30995388]   | (hemX) heme biosynthesis-like protein [Heme biosynthesis (CVF506)] [Haemophilus influenzae Rd KW20]                                                                  | c_amazonense.gapped1200_mauve.fasta.36   |
| VFG013794[gi 146281442]  | (pilQ) type 4 pilus biogenesis protein PilQ [Type IV pilus biosynthesis (CVF518)] [Pseudomonas stutzeri A1501]                                                       | c_amazonense.gapped1200_mauve.fasta.3404 |
| VFG013800[gi 71731545]   | (pilQ) type IV pilus pilgrillin peptide PilQ [Type IV pilus biosynthesis (CVF518)] [Pseudomonas syringae pv. phaseolicola 1448A]                                     | c_amazonense.gapped1200_mauve.fasta.3576 |
| VFG013811[gi 28868044]   | (pilQ) type IV pilus biogenesis protein PilQ [Type IV pilus biosynthesis (CVF518)] [Pseudomonas syringae pv. tomatato str. DC3000]                                   | c_amazonense.gapped1200_mauve.fasta.2546 |
| VFG013820[gi 146281354]  | (pilE) type 4 fimbrial biogenesis protein PilE [Type IV pilus biosynthesis (CVF518)] [Pseudomonas stutzeri A1501]                                                    | c_amazonense.gapped1200_mauve.fasta.677  |
| VFG013848[gi 152985916]  | (pilN) type 4 fimbrial biogenesis protein PilN [Type IV pilus biosynthesis (CVF518)] [Pseudomonas aeruginosa PA7]                                                    | c_amazonense.gapped1200_mauve.fasta.676  |
| VFG013867[gi 77456635]   | (pilO) Pilus assembly protein, PilO [Type IV pilus biosynthesis (CVF518)] [Pseudomonas fluorescens Pf0-1]                                                            | c_amazonense.gapped1200_mauve.fasta.675  |
| VFG013881[gi 146305582]  | (pilP) Pilus assembly protein, PilP [Type IV pilus biosynthesis (CVF518)] [Pseudomonas mendocina ynp]                                                                | c_amazonense.gapped1200_mauve.fasta.674  |
| VFG013887[gi 66043674]   | (pilQ) type II and III secretion system protein:NoiW-like:NoiW-like [Type IV pilus biosynthesis (CVF518)] [Pseudomonas syringae pv. syringae B728A]                  | c_amazonense.gapped1200_mauve.fasta.74   |
| VFG013907[gi 146309163]  | (pilQ) twitching motility protein [Type IV pilus biosynthesis (CVF518)] [Pseudomonas mendocina ynp]                                                                  | c_amazonense.gapped1200_mauve.fasta.1284 |
| VFG013912[gi 28870209]   | (pilU) twitching motility protein [Type IV pilus biosynthesis (CVF518)] [Pseudomonas syringae pv. tomatato str. DC3000]                                              | c_amazonense.gapped1200_mauve.fasta.3301 |
| VFG013954[gi 146306666]  | (pilZ) type IV pilus assembly PilZ [Type IV pilus biosynthesis (CVF518)] [Pseudomonas mendocina ynp]                                                                 | c_amazonense.gapped1200_mauve.fasta.3923 |
| VFG014002[gi 146283959]  | (pilS) two-component sensor PilS [Type IV pilus biosynthesis (CVF518)] [Pseudomonas stutzeri A1501]                                                                  | c_amazonense.gapped1200_mauve.fasta.3622 |
| VFG014099[gi 15598355]   | (wbpA) probable UDP-glucose/GDP-mannose dehydrogenase WbpA [LPS O-antigen (P. aeruginosa) (CVF520)] [Pseudomonas aeruginosa PAO1]                                    | c_amazonense.gapped1200_mauve.fasta.435  |
| VFG014099[gi 15598355]   | (wbpA) probable UDP-glucose/GDP-mannose dehydrogenase WbpA [LPS O-antigen (P. aeruginosa) (CVF520)] [Pseudomonas aeruginosa PAO1]                                    | c_amazonense.gapped1200_mauve.fasta.503  |
| VFG014106[gi 15598348]   | (hItB) gltI aminotransferase [LPS O-antigen (P. aeruginosa) (CVF520)] [Pseudomonas aeruginosa PAO1]                                                                  | c_amazonense.gapped1200_mauve.fasta.3614 |
| VFG014109[gi 15598345]   | (wbpH) probable glycosyltransferase WbpH [LPS O-antigen (P. aeruginosa) (CVF520)] [Pseudomonas aeruginosa PAO1]                                                      | c_amazonense.gapped1200_mauve.fasta.4148 |
| VFG014116[gi 155983338]  | (PA3142) hypothetical protein [LPS O-antigen (P. aeruginosa) (CVF520)] [Pseudomonas aeruginosa PAO1]                                                                 | c_amazonense.gapped1200_mauve.fasta.3610 |
| VFG014147[gi 116051137]  | (wbpM) nucleotide sugar epimerase/dehydratase WbpM [LPS O-antigen (P. aeruginosa) (CVF520)] [Pseudomonas aeruginosa UCBBP-PA14]                                      | c_amazonense.gapped1200_mauve.fasta.3437 |
| VFG014292[gi 152985351]  | (fliC) A-type Flagellin [Flagella (CVF521)] [Pseudomonas aeruginosa PA7]                                                                                             | c_amazonense.gapped1200_mauve.fasta.3434 |
| VFG014329[gi 146282226]  | (fliD) flagellar capping protein FliD [Flagella (CVF521)] [Pseudomonas stutzeri A1501]                                                                               | c_amazonense.gapped1200_mauve.fasta.2996 |
| VFG014378[gi 70729027]   | (fleS) sensory box histidine kinase FleS [Flagella (CVF521)] [Pseudomonas fluorescens Pf-5]                                                                          | c_amazonense.gapped1200_mauve.fasta.2555 |
| VFG014561[gi 77457777]   | (fliQ) flagellar biosynthesis protein [Flagella (CVF521)] [Pseudomonas fluorescens Pf0-1]                                                                            | c_amazonense.gapped1200_mauve.fasta.914  |
| VFG014628[gi 146282909]  | (fleN) flagellar motor regulator FleN [Flagella (CVF521)] [Pseudomonas stutzeri A1501]                                                                               | c_amazonense.gapped1200_mauve.fasta.912  |
| VFG014707[gb NP_250151]  | (motC) flagellar motor protein [Deoxyhexose linking sugar, 209 Da capping structure (A1138)] [Pseudomonas aeruginosa PAO1]                                           | c_amazonense.gapped1200_mauve.fasta.2726 |
| VFG014731[gi 146307821]  | (motD) OmpA/MotB domain protein [Flagella (CVF521)] [Pseudomonas mendocina ynp]                                                                                      | c_amazonense.gapped1200_mauve.fasta.2218 |
| VFG014894[gi 1529858001] | (algC) phosphomannomutase AlgC [Alginate biosynthesis (CVF523)] [Pseudomonas aeruginosa PA7]                                                                         | c_amazonense.gapped1200_mauve.fasta.2170 |
| VFG014942[gi 774575914]  | (algH) Sigma-E regulatory protein MuD [Alginate regulation (CVF523)] [Pseudomonas fluorescens Pf0-1]                                                                 | c_amazonense.gapped1200_mauve.fasta.2169 |
| VFG014950[gb NP_294957]  | (mucD) serine protease MucD precursor [Alginate regulation (CVF523)] [Pseudomonas aeruginosa PAO1]                                                                   | c_amazonense.gapped1200_mauve.fasta.2871 |
| VFG014952[gi 116048682]  | (mucD) serine protease MucD precursor [Alginate regulation (CVF523)] [Pseudomonas aeruginosa UCBBP-PA14]                                                             | c_amazonense.gapped1200_mauve.fasta.1458 |
| VFG014966[gi 28867367]   | (algR) alginate biosynthesis regulatory protein AlgR [Alginate regulation (CVF523)] [Pseudomonas syringae pv. tomatato str. DC3000]                                  | c_amazonense.gapped1200_mauve.fasta.2756 |
| VFG014966[gi 28867367]   | (algR) alginate biosynthesis regulatory protein AlgR [Alginate regulation (CVF523)] [Pseudomonas syringae pv. tomatato str. DC3000]                                  | c_amazonense.gapped1200_mauve.fasta.2789 |
| VFG014966[gi 28867367]   | (algR) alginate biosynthesis regulatory protein AlgR [Alginate regulation (CVF523)] [Pseudomonas syringae pv. tomatato str. DC3000]                                  | c_amazonense.gapped1200_mauve.fasta.121  |
| VFG014974[gi 146305320]  | (algR) two component transcriptional regulator, LytTR family [Alginate regulation (CVF523)] [Pseudomonas mendocina ynp]                                              | c_amazonense.gapped1200_mauve.fasta.3897 |
| VFG014981[gi 71736095]   | (algZ) sensor histidine kinase FimS [Alginate regulation (CVF523)] [Pseudomonas syringae pv. phaseolicola 1448A]                                                     | c_amazonense.gapped1200_mauve.fasta.257  |
| VFG015057[gi 152986918]  | (lasI) autoinducer synthase protein LasI [N-(3-oxo-dodecanoyl)-L-homoserine lactone QS system (CVF526)] [Pseudomonas aeruginosa PA7]                                 | c_amazonense.gapped1200_mauve.fasta.1377 |
| VFG015072[gi 71734710]   | (gacS) response regulator, sensor histidine kinase component GacS [GacS/GacA two-component system (CVF529)] [Pseudomonas syringae pv. phaseolicola 1448A]            | c_amazonense.gapped1200_mauve.fasta.2106 |
| VFG015085[gi 71738055]   | (gacA) response regulator, DNA binding component GacA [GacS/GacA two-component system (CVF529)] [Pseudomonas syringae pv. phaseolicola 1448A]                        | c_amazonense.gapped1200_mauve.fasta.781  |
| VFG015456[gi 71735435]   | (hcp1) ScpM protein [Hcp secretion island-1 encoded type VI secretion system (H-T655) (CVF535)] [Pseudomonas syringae pv. phaseolicola 1448A]                        | c_amazonense.gapped1200_mauve.fasta.785  |
| VFG015475[gi 66048180]   | (PsrY_4956) protein of unknown function DUF879 [Hcp secretion island-1 encoded type VI secretion system (H-T655) (CVF535)] [Pseudomonas syringae pv. syringae B728A] | c_amazonense.gapped1200_mauve.fasta.210  |
| VFG015519[gi 152985181]  | (phzG) phaeazine biosynthesis protein PhzG [Phaeazine biosynthesis (CVF536)] [Pseudomonas aeruginosa PA7]                                                            | c_amazonense.gapped1200_mauve.fasta.30   |
| VFG015521[gb NP_252906]  | (phzG1) phaeazine biosynthesis protein PhzG, pyridoxamine 5'-phosphate aldolase [Phaeazines biosynthesis (CVF536)] [Pseudomonas aeruginosa PAO1]                     | c_amazonense.gapped1200_mauve.fasta.31   |
| VFG015558[gi 116051721]  | (lasB) elastase LasB [Elastase (CVF537)] [Pseudomonas aeruginosa UCBBP-PA14]                                                                                         | c_amazonense.gapped1200_mauve.fasta.1453 |
| VFG015600[gi 152984031]  | (hdsS) probable acyltransferase [Acylhomoserine lactone synthase (CVF528)] [Pseudomonas aeruginosa PA7]                                                              | c_amazonense.gapped1200_mauve.fasta.2358 |
| VFG015650[gi 73034944]   | (fliG) flagellar basal body FlhE domain protein [Flagella (CVF521)] [Pseudomonas putida GB-1]                                                                        | c_amazonense.gapped1200_mauve.fasta.1118 |
| VFG015681[gi 70722859]   | (fleR) two component, sigma54 specific, transcriptional regulator, Fis family [Flagella (CVF521)] [Pseudomonas putida W619]                                          | c_amazonense.gapped1200_mauve.fasta.1588 |
| VFG015774[gi 167032166]  | (mucP) membrane-associated zinc metalloprotease [Alginate regulation (CVF523)] [Pseudomonas putida GB-1]                                                             | c_amazonense.gapped1200_mauve.fasta.788  |
| VFG015806[gi 70721686]   | (cnpV1) type VI secretion ATPase, CnpV1 family [Hcp secretion island-1 encoded type VI secretion system (H-T655) (CVF535)] [Pseudomonas putida W619]                 | c_amazonense.gapped1200_mauve.fasta.215  |
| VFG015881[gi 28871838]   | (PSPTO_4713) alanyl tRNA synthetase-related protein [Phytotoxin coronatine (CVF545)] [Pseudomonas syringae pv. tomatato str. DC3000]                                 | c_amazonense.gapped1200_mauve.fasta.3331 |
| VFG015881[gi 28871838]   | (PSPTO_4713) alanyl tRNA synthetase-related protein [Phytotoxin coronatine (CVF545)] [Pseudomonas syringae pv. tomatato str. DC3000]                                 | c_amazonense.gapped1200_mauve.fasta.2222 |
| VFG015885[gi 71736839]   | (cysC1) adenylylsulfate kinase [Phytotoxin phaseolotoxin (CVF546)] [Pseudomonas syringae pv. phaseolicola 1448A]                                                     | c_amazonense.gapped1200_mauve.fasta.2838 |
| VFG015888[gi 71737277]   | (PSPPH_4304) hydrolase, HAD-superfamily, subfamily IIA [Phytotoxin phaseolotoxin (CVF546)] [Pseudomonas syringae pv. phaseolicola 1448A]                             | c_amazonense.gapped1200_mauve.fasta.2187 |
| VFG015903[gi 71735677]   | (argK) phaseolotoxin-insensitive ornithine carbamoyltransferase [Phytotoxin phaseolotoxin (CVF546)] [Pseudomonas syringae pv. phaseolicola 1448A]                    | c_amazonense.gapped1200_mauve.fasta.248  |
| VFG015903[gi 71735677]   | (argK) phaseolotoxin-insensitive ornithine carbamoyltransferase [Phytotoxin phaseolotoxin (CVF546)] [Pseudomonas syringae pv. phaseolicola 1448A]                    | c_amazonense.gapped1200_mauve.fasta.3357 |
| VFG015914[gi 15597389]   | (hcnA) hydrogen cyanide synthase HcnA [Hydrogen cyanide production (CVF549)] [Pseudomonas aeruginosa PAO1]                                                           | c_amazonense.gapped1200_mauve.fasta.2829 |
| VFG015925[gi 77459737]   | (hcnB) BFD-like [2Fe-2S]-binding region [Hydrogen cyanide production (CVF549)] [Pseudomonas fluorescens Pf0-1]                                                       | c_amazonense.gapped1200_mauve.fasta.2830 |
| VFG015927[gi 152985611]  | (hcnC) hydrogen cyanide synthase HcnC [Hydrogen cyanide production (CVF549)] [Pseudomonas aeruginosa PA7]                                                            | c_amazonense.gapped1200_mauve.fasta.2328 |
| VFG015930[gi 70729947]   | (hcnC) hydrogen cyanide synthase HcnC [Hydrogen cyanide production (CVF549)] [Pseudomonas fluorescens Pf-5]                                                          | c_amazonense.gapped1200_mauve.fasta.2831 |
| VFG015972[gi 146307893]  | (pvdA) Lysine/ornithine N-monooxygenase-like protein [Pyoverdine (CVF551)] [Pseudomonas mendocina ynp]                                                               | c_amazonense.gapped1200_mauve.fasta.562  |
| VFG016039[gi 152983967]  | (pvdJ) thermophilic carboxylesterase EstZ [Pyoverdine (CVF551)] [Pseudomonas aeruginosa PA7]                                                                         | c_amazonense.gapped1200_mauve.fasta.238  |
| VFG016057[gi 146307890]  | (pvdH) 2,4-diaminobutyrate 4-transaminase [Pyoverdine (CVF551)] [Pseudomonas mendocina ynp]                                                                          | c_amazonense.gapped1200_mauve.fasta.563  |

VF061630(gi:15078902) (capD) gamma-glutamyltranspeptidase [Polyglutamic acid capsule (CVF566)] [Bacillus subtilis subsp. subtilis str. 168]

VF061637(gi:42784426) (galE) UDP-glucose 4-epimerase [Polysaccharide capsule (CVF567)] [Bacillus cereus ATCC 10987]

VF061639(gi:42784429) (BCE\_3384) NAD dependent epimerase/dehydratase family protein [Polysaccharide capsule (CVF567)] [Bacillus cereus ATCC 10987]

VF061690(gi:4947840) (BT9727\_4951) conserved hypothetical protein, possible MVN-like virulence factor [Polysaccharide capsule (CVF567)] [Bacillus thuringiensis serovar konkukian str. 97-27]

VF0616433(gi:118480317) (gtab) UTP-glucose-1-phosphate uridylyltransferase [Polysaccharide capsule (CVF567)] [Bacillus thuringiensis str. Al Hakam]

VF0616433(gi:118480317) (gtab) UTP-glucose-1-phosphate uridylyltransferase [Polysaccharide capsule (CVF567)] [Bacillus thuringiensis str. Al Hakam]

VF0616485(gi:31544430) (tuf) elongation factor Tu [EF-Tu (CVF587)] [Mycoplasma gallisepticum str. R(10w)]

VF0616485(gi:31544430) (tuf) elongation factor Tu [EF-Tu (CVF587)] [Mycoplasma gallisepticum str. R(10w)]

VF0616486(gi:54020567) (tuf) elongation factor Tu [EF-Tu (CVF587)] [Mycoplasma hyopneumoniae 232]

VF0616676(gi:9475416) (cnaB) Outer membrane arabinic acid-binding protein (A25-7) [Bartonella henselae str. Houston-1]

VF0617360(gi:153950020) (dhaA) glucose-1-phosphate cytidyl transferase [O-antigen (VF043)] [Yersinia pseudotuberculosis IP 31758]

VF0617486(gi:118462718) (nuoG) NADH-quinone oxidoreductase, chain g [nuoG (CVF620)] [Mycobacterium avium 104]

VF0617670(gi:443489219) (icl) isocitrate lyase Icl [Isocitrate lyase (CVF320)] [Mycobacterium liflandii 128FX1]

VF0617733(gi:153952077) (pebA) amino acid ABC transporter, periplasmic amino acid-binding protein PEB1 [PEB1/CBF1 (CVF388)] [Campylobacter jejuni subsp. jejuni 81116]

VF0617759(gi:153951764) (kpsF) arabinose-5-phosphate isomerase [Capsule biosynthesis and transport (CVF393)] [Campylobacter jejuni subsp. jejuni 81116]

VF0617761(gi:153952331) (kpsE) capsular polysaccharide ABC transporter [Capsule biosynthesis and transport (CVF393)] [Campylobacter jejuni subsp. jejuni 81116]

VF0617855(gi:153948767) (pilW) putative transposase [Type IV pili (CVF049)] [Yersinia pseudotuberculosis IP 31758]

VF0617855(gi:153948767) (pilW) putative transposase [Type IV pili (CVF049)] [Yersinia pseudotuberculosis IP 31758]

VF0617855(gi:153948767) (pilW) putative transposase [Type IV pili (CVF049)] [Yersinia pseudotuberculosis IP 31758]

VF0617989(gi:157415665) (CB1\_1346) hypothetical protein [Capsule biosynthesis and transport (CVF393)] [Campylobacter jejuni subsp. jejuni 81116]

VF0617989(gi:157415665) (CB1\_1346) hypothetical protein [Capsule biosynthesis and transport (CVF393)] [Campylobacter jejuni subsp. jejuni 81116]

VF0617989(gi:157415665) (CB1\_1346) hypothetical protein [Capsule biosynthesis and transport (CVF393)] [Campylobacter jejuni subsp. jejuni 81116]

VF0618020(gi:157415415) (gmhA-1) phosphoethanol isomerase [LOS (CVF386)] [Mycobacterium avium subsp. jejuni 81116]

VF0618293(gi:161620106) (dhaB) Probable isochromatase [Bruceabactin (CVF386)] [Brucella canis ATCC 23365]

VF0618336(gi:161612541) (staB) hypothetical protein [Sta (VF019)] [Salmonella enterica subsp. enterica serovar Paratyphi B str. SPB7]

VF0618402(gi:1616105694) (mgfB) hypothetical protein [Mg<sup>2+</sup> transport (CVF005)] [Salmonella enterica subsp. enterica serovar G24:2,3::str. RSK2980]

VF0618554(gi:1616102085) (prgK) hypothetical protein [TTSS (SPI-1 encode) (CVF031)] [Salmonella enterica subsp. enterica serovar G24:2,3::str. RSK2980]

VF0618558(gi:1616102087) (orgB) hypothetical protein [TTSS (SPI-1 encode) (CVF031)] [Salmonella enterica subsp. enterica serovar G24:2,3::str. RSK2980]

VF0618707(gi:163869212) (korB) trans-acting regulatory protein [Trw type IV secretion system (CVF604)] [Bartonella tribocorum CIP 105476]

VF0618707(gi:163869212) (korB) trans-acting regulatory protein [Trw type IV secretion system (CVF604)] [Bartonella tribocorum CIP 105476]

VF0618707(gi:163869212) (korB) trans-acting regulatory protein [Trw type IV secretion system (CVF604)] [Bartonella tribocorum CIP 105476]

VF0618806(gi:161870575) (icdE) biopolymer transport protein [Ton system (CVF202)] [Neisseria meningitidis 053442]

VF0618806(gi:161870575) (icdE) biopolymer transport protein [Ton system (CVF202)] [Neisseria meningitidis 053442]

VF0618806(gi:161870575) (icdE) biopolymer transport protein [Ton system (CVF202)] [Neisseria meningitidis 053442]

VF0619028(gi:170025406) (YPK\_2189) DegT/DnaI/ErpC/Sly5 aminotransferase [O-antigen (VF043)] [Yersinia pseudotuberculosis YPIII]

VF0619252(gi:163844264) (virB4) type IV secretion/conjugial transfer ATPase, VirB4 family [Type IV secretion system (CVF385)] [Brucella suis ATCC 23445]

VF0619276(gi:163844212) (dhaB) hypothetical protein [Bruceabactin (CVF386)] [Brucella suis ATCC 23445]

VF0619334(gi:25685884) (dhcC) isochromatase synthase [Bruceabactin (CVF386)] [Brucella melitensis ATCC 23457]

VF0619335(gi:25685883) (dhbE) 2,3-dihydroxybenzoate-AMP ligase [Bruceabactin (CVF386)] [Brucella melitensis ATCC 23457]

VF0619385(gi:26224673) (bsh) conjugated bile acid hydrolase [Bile-salt hydrolase (CVF250)] [Listeria monocytogenes serotype 4b str. CLIP 80459]

VF0619431(gi:188527050) (napA) neutrophil activating protein (napA) (bacterioferritin) [Neutrophil-activating protein (HP-NAP) (CVF215)] [Helicobacter pylori Sh470]

VF0619544(gi:210134297) (fucC) alpha-1,2-fucosyltransferase [Lipopolysaccharide Lewis antigens (CVF222)] [Helicobacter pylori P12]

VF0619722(gi:194091955) (exlB) ExbB [Ton system (CVF202)] [Neisseria gonorrhoeae NGCP11945]

VF0619732(gi:196858336) (YFP15\_1052) lipase-like proteins leader peptide processing enzyme [Type IV pili biosynthesis (CVF518)] [Pseudomonas fluorescens SBW25]

VF0620307(gi:160894378) (YFP15\_1052) lipase-like proteins leader peptide processing enzyme [Type IV pili biosynthesis (CVF518)] [Pseudomonas fluorescens SBW25]

VF0620307(gi:160894378) (YFP15\_1052) lipase-like proteins leader peptide processing enzyme [Type IV pili biosynthesis (CVF518)] [Pseudomonas fluorescens SBW25]

VF0620437(gi:194736233) (icgE) invasion protein [Invasion protein (CVF031)] [Salmonella enterica subsp. enterica serovar Schwarzengrund str. CVM19633]

VF0621683(gi:197251878) (stjC) putative periplasmic chaperone protein [Stj (VF028)] [Salmonella enterica subsp. enterica serovar Agona str. SL483]

VF0621856(gi:118470693) (fxbA) Formyl transferase [exochelin (A0323)] [Mycobacterium smegmatis str. MC2 155]

VF0622587(gi:333989098) (icl) isocitrate lyase Icl [Isocitrate lyase (CVF302)] [Mycobacterium sp. JDM601]

VF0622623(gi:333992530) (panD) aspartate 1-decarboxylase precursor PanD [Pantothenate synthesis (CVF305)] [Mycobacterium sp. JDM601]

VF0622639(gi:333991835) (proC) pyrroline-5-carboxylate reductase ProC [Proline synthesis (CVF307)] [Mycobacterium sp. JDM601]

VF0622709(gi:169629208) (mbtE) putative peptide synthetase MbtE [Mycoabactin (CVF315)] [Mycobacterium abscessus ATCC 19977]

VF0622816(gi:169630604) (nirK) integral membrane nitrite extrusion protein NirK [Nitrate/nitrite transporter (CVF320)] [Mycobacterium abscessus ATCC 19977]

VF0623783(gi:332161122) (YE105\_C1504) Mannose-1-phosphate guanylyltransferase, ManC protein [O-antigen (CVF043)] [Yersinia enterocolitica subsp. palearctica 105.5R(1)]

VF0623786(gi:332161126) (YE105\_C1504) GDP-mannose 4,6-dehydratase [O-antigen (CVF043)] [Yersinia enterocolitica subsp. palearctica 105.5R(1)]

VF0623952(gi:315443880) (sprY) anthranilate phosphoribosyltransferase [Tryptophan synthesis (CVF308)] [Burkholderia thailandensis cnpM SpY1]

VF0624912(gi:262382190) (shvA) type IVB pilus form protein [ShvA (CVF381)] [Burkholderia thailandensis cnpM SpY1]

VF0625389(gi:53723902) (flm) flagellar motor switch protein Flm [Flagella

(fimH) long polar fimbrial protein LpfA [Type I fimbriae (CVF426)] [Escherichia coli O104:H+ str. 2009EL-2050]  
(hlyD) hemolysin secretion protein D [Alpha-hemolysin (CVF453)] [Escherichia coli ABU 83972]  
(hlyB) hemolysin B [Alpha-hemolysin (CVF453)] [Escherichia coli O103:H2 str. 12009]  
(hlyB) hemolysin secretion protein HlyB [Alpha-hemolysin (CVF453)] [Escherichia coli ABU 83972]  
(chuT) Periplasmic heme-binding protein (Hemin uptake [CVF460]) [Escherichia coli NA114]  
(lbeB) copper/silver efflux system outer membrane protein CusC [Invasion of brain endothelial cells (lbes) (CFV249)] [Escherichia coli O127:H6 str. E2348/69]  
(lbeB) Cation efflux system protein cusC [Invasion of brain endothelial cells (lbes) (CFV249)] [Escherichia coli O83:H1 str. LF82]  
(ECO42\_4530) putative type VI secretion protein [SCI-H (SS183)] [Escherichia coli Q44:H18 A04]  
(ECS5989\_3327) hypothetical protein [SCI-H T655 (CVF734)] [Escherichia coli S5989]  
(aacC) ABC transporter ATP binding domain [ABC transporters (CVF737)] [Escherichia coli O78:H1X80 str. H10407]  
(rfaP) ADP-heptose -1,5 heptosyltransferase [LOS synthesis (CVF718)] [Neisseria lactamica 020-06]  
(plwI) type IV pilus biogenesis/stability protein [Type IV pili (CVF189)] [Neisseria meningitidis M01-240149]  
(porB) major outer membrane protein P.IB precursor [PorB (CVF195)] [Neisseria meningitidis G2136]  
(porB) major outer membrane protein P.IB precursor [PorB (CVF195)] [Neisseria meningitidis G2136]  
(porB) major outer membrane protein P.IB precursor [PorB (CVF195)] [Neisseria meningitidis G2136]  
(exdB) biopolymer transport protein [Ton system (CVF202)] [Neisseria lactamica 020-06]  
(exdE) biopolymer transport protein [Ton system (CVF202)] [Neisseria lactamica 020-06]  
(kdaA\_waaA)-3 deoxy-D-manno-octulosonic acid synthesis [LOS synthesis (CVF187)] [Neisseria meningitidis alpha14]  
(rfaC) lipopolysaccharide heptosyltransferase I [LOS synthesis (CVF187)] [Neisseria meningitidis Z2491]  
(plvI) putative type IV pilin protein [Type IV pili (CVF189)] [Neisseria meningitidis alpha14]  
(farA) efflux pump protein, fatty acid resistance [FarAB (CVF758)] [Neisseria gonorrhoeae NCCP11945]  
(farA) putative efflux pump protein [FarAB (CVF758)] [Neisseria meningitidis alpha14]  
(farA) multidrug resistance translocase [FarAB (CVF758)] [Neisseria lactamica 020-06]  
(farA) multidrug resistance protein B [FarAB (CVF758)] [Neisseria meningitidis R013]  
(farB) antibacterial fatty acid resistance protein B [FarAB (CVF758)] [Neisseria meningitidis G2136]  
(farB) bacterial resistance translocase [FarAB (CVF758)] [Neisseria lactamica 020-06]  
(mtrC) antibiotic resistance efflux pump component [MtrCDE (CVF759)] [Neisseria gonorrhoeae NCCP11945]  
(mtrC) antibiotic resistance efflux pump component [MtrCDE (CVF759)] [Neisseria gonorrhoeae NCCP11945]  
(mtrC) membrane fusion protein MtrC [MtrCDE (CVF759)] [Neisseria meningitidis M01-240355]  
(mtrD) drug efflux protein [MtrCDE (CVF759)] [Neisseria meningitidis Z2491]  
(mtrD) drug efflux transport protein MTrD [MtrCDE (CVF759)] [Neisseria meningitidis WuY 2594]  
(mtrD) drug efflux transport protein MTrD [MtrCDE (CVF759)] [Neisseria meningitidis R013]  
(mtrE) multiple transferable antibiotic resistance system protein MTR [MtrCDE (CVF759)] [Neisseria meningitidis M04-240196]  
(mntA) ABC transporter ATP binding domain [Manganese transport system (CVF761)] [Neisseria gonorrhoeae FA 1090]  
(mntB) putative ABC transporter membrane protein [Manganese transport system (CVF761)] [Neisseria meningitidis alpha170]  
(mntC) putative periplasmic solute binding protein [Manganese transport system (CVF761)] [Neisseria meningitidis alpha14]  
(msrA/B[plm]) peptide methionine sulfoxide reductase MsrA/MsrB [includes: thiorodone, peptide methionine sulfoxide reductase MsrA (protein-methionine-S-oxide reductase  
(msrA/B[plm]) peptide methionine sulfoxide reductase [Methionine sulphoxide reductase (CVF762)] [Neisseria lactamica 020-06]  
(reCN) DNA repair protein [Recombinational repair protein (CVF763)] [Neisseria lactamica 020-06]  
(ABK1\_0905) transcriptional regulator [Heme utilization (CVF769)] [Acinetobacter baumannii 1656-2]  
(hemoI) heme oxygenase [Heme utilization (CVF769)] [Acinetobacter baumannii TYTH-1]  
(adefR) RNA efflux transporter [AdeFGH efflux pump/transport autoinducer (CVF773)] [Acinetobacter baumannii D127979]  
(adegN) RND family efflux transporter [AdeFGH efflux pump/transport autoinducer (CVF773)] [Acinetobacter baumannii AB0057]  
(adegN) RND family efflux transporter [AdeFGH efflux pump/transport autoinducer (CVF773)] [Acinetobacter baumannii AB0057]  
(adegN) RND family efflux transporter [AdeFGH efflux pump/transport autoinducer (CVF773)] [Acinetobacter baumannii AB0057]  
(adegN) RND family efflux transporter [AdeFGH efflux pump/transport autoinducer (CVF773)] [Acinetobacter baumannii AB0057]  
(adegH) Node family efflux transporter outer membrane lipoprotein [AdeFGH efflux pump/transport autoinducer (CVF773)] [Acinetobacter baumannii TYTH-1]  
(adegH) Node family efflux transporter outer membrane lipoprotein [AdeFGH efflux pump/transport autoinducer (CVF773)] [Acinetobacter baumannii TYTH-1]  
(adegH) Node family efflux transporter outer membrane lipoprotein [AdeFGH efflux pump/transport autoinducer (CVF773)] [Acinetobacter baumannii TYTH-1]  
(adegH) Node family efflux transporter outer membrane lipoprotein [AdeFGH efflux pump/transport autoinducer (CVF773)] [Acinetobacter baumannii TYTH-1]  
(lpxL) Lauryl/myristoyl acyltransferase [LPS (CVF774)] [Acinetobacter baumannii BJAB0715]  
(MQ3\_285) nucleoside-diphosphate sugar epimerase [Capsule (CVF775)] [Acinetobacter baumannii TYTH-1]  
(A1S\_0054) WbbJ protein [Capsule (CVF775)] [Acinetobacter baumannii ATCC 17978]  
(A1S\_0056) O-antigen translocase [Capsule (CVF775)] [Acinetobacter baumannii ATCC 17978]  
(MQ3\_289) Sel1 repeat protein [Capsule (CVF775)] [Acinetobacter baumannii TYTH-1]  
(BJA80710\_00096) putative UDP-glucose 6-dehydrogenase [Capsule (CVF775)] [Acinetobacter baumannii BJAB0710]  
(ABSDF0072) polysaccharide biosynthesis protein [Capsule (CVF775)] [Acinetobacter baumannii SDP]  
(ABK1\_0097) transposase [Capsule (CVF775)] [Acinetobacter baumannii 1656-2]  
(bfmR) putative response regulator (activator) in two-component regulatory system (OmpR family) [Two-component system (CVF778)] [Acinetobacter baumannii 1656-2]  
(bfmR) putative response regulator (activator) in two-component regulatory system (OmpR family) [Two-component system (CVF778)] [Acinetobacter baumannii 1656-2]  
(bfmR) putative response regulator (activator) in two-component regulatory system (OmpR family) [Two-component system (CVF778)] [Acinetobacter baumannii 1656-2]  
(bfmS) sensory histidine kinase in two-component regulatory system with RstA [Two-component system (CVF778)] [Acinetobacter baumannii D127979]  
(bfmS) signal transduction histidine kinase [Two-component system (CVF778)] [Acinetobacter baumannii TYTH-1]  
(pbpG) D-alanyl-D-alanine endopeptidase [PbpG (CVF779)] [Acinetobacter baumannii ATCC 17978]  
(fimD) fimbrial chaperone protein [Type I pili (VF0486)] [Aeromonas hydrophila ML09-119]  
(tpoB) type IV pilus assembly protein [Tap type IV pili (CVF783)] [Aeromonas salmonicida subsp. salmonicida A449]  
(AHA\_1389) ColCo/CobM/Mind/Para family protein [Polar flagella (CVF786)] [Aeromonas hydrophila subsp. hydrophila ATCC 7966]  
(VSA\_1361) SedA-like and chromosome partitioning protein [Pole flagella (CVF786)] [Aeromonas salmonicida subsp. salmonicida A449]  
(AFA\_1361) SedB-like and chromosome partitioning protein [Pole flagella (CVF786)] [Aeromonas salmonicida subsp. salmonicida A449]  
(flaxA) flagellin [Polar flagella (VF0473)] [Aeromonas hydrophila ML09-119]  
(flaxA) flagellin [Polar flagella (VF0473)] [Aeromonas hydrophila ML09-119]  
(chexV) two-component system chemotaxis response regulator CheV [Polar flagella (CVF786)] [Aeromonas salmonicida subsp. salmonicida A449]  
(flmH) short chain dehydrogenase/reductase family oxidoreductase [Polar flagella (CVF786)] [Aeromonas hydrophila subsp. hydrophila ATCC 7966]  
(flmH) short chain dehydrogenase/reductase family oxidoreductase [Polar flagella (CVF786)] [Aeromonas hydrophila subsp. hydrophila ATCC 7966]  
(flmH) 3-oxoacyl-ACP reductase [Polar flagella (VF0473)] [Aeromonas hydrophila ML09-119]  
(flmH) 3-oxoacyl-ACP reductase [Polar flagella (VF0473)] [Aeromonas hydrophila ML09-119]  
(flmH) 3-oxoacyl-ACP reductase [Polar flagella (VF0473)] [Aeromonas hydrophila ML09-119]  
(flmH) 3-oxoacyl-ACP reductase [Polar flagella (VF0473)] [Aeromonas hydrophila ML09-119]  
(flmH) 3-oxoacyl-ACP reductase [Polar flagella (VF0473)] [Aeromonas hydrophila ML09-119]  
(flmH) 3-oxoacyl-ACP reductase [Polar flagella (VF0473)] [Aeromonas hydrophila ML09-119]  
(flrR) lateral flagellar biosynthetic protein Lflr [Lateral flagella (VF0474)] [Aeromonas salmonicida subsp. salmonicida A449]  
(hlyA) hemolysin [Hemolysin, HlyA (CVF792)] [Aeromonas salmonicida subsp. salmonicida A449]  
(hlyA) putative transporter [Hemolysin, HlyA (CVF792)] [Aeromonas veronii B565]  
(rtsh) hypothetical protein [The repeat in toxin (RTX) (CVF795)] [Aeromonas hydrophila subsp. hydrophila AT

VFG041139(gi:206558740) [bcsC] periplasmic solute-binding protein [T6SS [SS193]] [Burkholderia cenocepacia J2315]

VFG041142(gi:206558743) [tsiA/bcsP] putative type VI secretion system protein TsiA [T6SS [SS193]] [Burkholderia cenocepacia J2315]

VFG041143(gi:206558744) [tsiB/bcsO] putative type VI secretion system protein TsiB [T6SS [SS193]] [Burkholderia cenocepacia J2315]

VFG041146(gi:206558747) [tsiB/bcsC] putative type VI secretion system protein TsiB [T6SS [SS193]] [Burkholderia cenocepacia J2315]

VFG041147(gi:206558748) [tsiC/bcsK] putative type VI secretion system protein TsiC [T6SS [SS193]] [Burkholderia cenocepacia J2315]

VFG041149(gi:206558750) [tsiE/bcsC] putative type VI secretion system protein TsiE [T6SS [SS193]] [Burkholderia cenocepacia J2315]

VFG041156(gi:206558757) [tsiM/cmf/bcsB] putative type VI secretion system protein TsiM [T6SS [SS193]] [Burkholderia cenocepacia J2315]

VFG041184(gi:269139780) [evpG] type VI secretion system protein EvpG [EVP (E. tarda virulent protein) (SS189)] [Edwardsiella tarda EIB202]

VFG041188(gi:269139784) [evpK] type VI secretion system protein EvpK [EVP (E. tarda virulent protein) (SS189)] [Edwardsiella tarda EIB202]

VFG041304(gb|YP\_095978) [lirB] Dot/Icm type IV secretion system effector LirB [Dot/Icm (SS047)] [Legionella pneumophila subsp. pneumophila str. Philadelphia 1]

VFG041304(gb|YP\_095978) [lirB] Dot/Icm type IV secretion system effector LirB [Dot/Icm (SS047)] [Legionella pneumophila subsp. pneumophila str. Philadelphia 1]

VFG041317(gi:88600055) [virB9-1] type IV secretion system protein VirB9 [T4SS [SS055]] [Neorickettsia sennetsu str. Miyayama]

VFG041571(gi:283784668) [nleK] hypothetical protein [T3SS [SS022]] [Citrobacter rodentium ICC168]

VFG041575(gi:269138242) [esrB] two-component response regulator EsrB, LuxR family [T3SS [SS025]] [Edwardsiella tarda EIB202]

VFG041577(gi:269138241) [esrA] two-component sensor/regulator EsrA [T3SS [SS025]] [Edwardsiella tarda EIB202]

VFG041578(gi:269138240) [ETAe\_0884] putative transglycosylase signal peptide protein [T3SS [SS025]] [Edwardsiella tarda EIB202]

VFG041579(gi:269138239) [esalU] type III secretion apparatus protein [T3SS [SS025]] [Edwardsiella tarda EIB202]

VFG041580(gi:269138237) [esalS] type III secretion apparatus [T3SS [SS025]] [Edwardsiella tarda EIB202]

VFG041581(gi:269138238) [esalT] type III secretion apparatus protein [T3SS [SS025]] [Edwardsiella tarda EIB202]

VFG041582(gi:269138235) [esalM] type III secretion apparatus protein [T3SS [SS025]] [Edwardsiella tarda EIB202]

VFG041583(gi:269138236) [esalR] type three secretion apparatus protein R [T3SS [SS025]] [Edwardsiella tarda EIB202]

VFG041584(gi:269138233) [esalN] type III secretion system ATPase [T3SS [SS025]] [Edwardsiella tarda EIB202]

VFG041585(gi:269138234) [esalV] type III secretion protein, HrcV family [T3SS [SS025]] [Edwardsiella tarda EIB202]

VFG041586(gi:269138230) [esalQ] translocation protein in type III secretion [T3SS [SS025]] [Edwardsiella tarda EIB202]

VFG041587(gi:269138231) [esalP] putative major facilitator family transporter [T3SS [SS025]] [Edwardsiella tarda EIB202]

VFG041588(gi:269138232) [esalO] type III secretion system ATPase [T3SS [SS025]] [Edwardsiella tarda EIB202]

VFG041589(gi:269138227) [esalC] type III secretion low calcium response chaperone [T3SS [SS025]] [Edwardsiella tarda EIB202]

VFG041590(gi:269138228) [esdB] EspA family secreted protein [T3SS [SS025]] [Edwardsiella tarda EIB202]

VFG041590(gi:269138228) [esdB] EspA family secreted protein [T3SS [SS025]] [Edwardsiella tarda EIB202]

VFG041591(gi:269138229) [esdC] hypothetical protein [T3SS [SS025]] [Edwardsiella tarda EIB202]

VFG041592(gi:269138224) [esdE] type III secretion system effector protein E [T3SS [SS025]] [Edwardsiella tarda EIB202]

VFG041593(gi:269138225) [esdD] type III secretion system effector protein D [T3SS [SS025]] [Edwardsiella tarda EIB202]

VFG041594(gi:269138226) [esdC] type III secretion system effector protein C [T3SS [SS025]] [Edwardsiella tarda EIB202]

VFG041595(gi:269138223) [esdB] type III secretion system chaperone protein B [T3SS [SS025]] [Edwardsiella tarda EIB202]

VFG041596(gi:269138221) [esalB] hypothetical protein [T3SS [SS025]] [Edwardsiella tarda EIB202]

VFG041598(gi:269138220) [esalC] type II secretory pathway, component PulD like protein [T3SS [SS025]] [Edwardsiella tarda EIB202]

VFG041599(gi:269138218) [ETAe\_0862] hypothetical protein [T3SS [SS025]] [Edwardsiella tarda EIB202]

VFG041600(gi:269138219) [esalD] type-III secretion protein [T3SS [SS025]] [Edwardsiella tarda EIB202]

VFG041601(gi:269138213) [esalI] putative type III secretion system apparatus lipoprotein [T3SS [SS025]] [Edwardsiella tarda EIB202]

VFG041602(gi:269138214) [esalI] putative type III secretion apparatus [T3SS [SS025]] [Edwardsiella tarda EIB202]

VFG041604(gi:269138216) [esalG] putative type III secretion system needle protein [T3SS [SS025]] [Edwardsiella tarda EIB202]

VFG041605(gi:269138217) [esrC] putative transcriptional regulator EsrC [T3SS [SS025]] [Edwardsiella tarda EIB202]

VFG041606(gi:269138212) [ETAe\_0856] hypothetical protein [T3SS [SS025]] [Edwardsiella tarda EIB202]

VFG041607(gi:269138211) [esalK] putative type III secretion apparatus [T3SS [SS025]] [Edwardsiella tarda EIB202]

VFG041609(gi:269138210) [esalL] putative type III secretion apparatus [T3SS [SS025]] [Edwardsiella tarda EIB202]

VFG041721(gi:206563884) [virB1] type III secretion system protein [T3SS [SS015]] [Burkholderia cenocepacia J2315]

VFG041722(gi:206563885) [BCAM2044] putative asparagine synthetase [T3SS [SS015]] [Burkholderia cenocepacia J2315]

VFG041839(gi:34498095) [cila] invasion protein regulator [Cpi-1a + Cpi-1 (SPI-1 like) (SS016)] [Chromobacterium violaceum ATCC 12472]

VFG041842(gi:34498090) [armR] two-component response regulator [Cpi-1a + Cpi-1 (SPI-1 like) (SS016)] [Chromobacterium violaceum ATCC 12472]

VFG041843(gi:34498093) [CV\_2638] hypothetical protein [Cpi-1a + Cpi-1 (SPI-1 like) (SS016)] [Chromobacterium violaceum ATCC 12472]

VFG041844(gi:34498087) [cviG] invasion protein -outer membrane [Cpi-1a + Cpi-1 (SPI-1 like) (SS016)] [Chromobacterium violaceum ATCC 12472]

VFG041845(gi:34498086) [cviE] invasion protein [Cpi-1a + Cpi-1 (SPI-1 like) (SS016)] [Chromobacterium violaceum ATCC 12472]

VFG041846(gi:34498085) [cviA] invasion protein [Cpi-1a + Cpi-1 (SPI-1 like) (SS016)] [Chromobacterium violaceum ATCC 12472]

VFG041847(gi:34498084) [cviB] surface presentation of antigens, secretory protein [Cpi-1a + Cpi-1 (SPI-1 like) (SS016)] [Chromobacterium violaceum ATCC 12472]

VFG041849(gi:34498083) [cviC] ATP synthase SpaI [Cpi-1a + Cpi-1 (SPI-1 like) (SS016)] [Chromobacterium violaceum ATCC 12472]

VFG041852(gi:34498079) [cpaP] surface presentation of antigens protein SpaP [Cpi-1a + Cpi-1 (SPI-1 like) (SS016)] [Chromobacterium violaceum ATCC 12472]

VFG041853(gi:34498076) [cpaS] surface presentation of antigens protein SpaS [Cpi-1a + Cpi-1 (SPI-1 like) (SS016)] [Chromobacterium violaceum ATCC 12472]

VFG041854(gi:34498077) [cpaR] surface presentation of antigens secretory protein [Cpi-1a + Cpi-1 (SPI-1 like) (SS016)] [Chromobacterium violaceum ATCC 12472]

VFG041855(gi:34498078) [cpaQ] surface presentation of antigens secretory protein [Cpi-1a + Cpi-1 (SPI-1 like) (SS016)] [Chromobacterium violaceum ATCC 12472]

VFG041856(gi:34498075) [cviA] surface presentation of antigens secretory protein [Cpi-1a + Cpi-1 (SPI-1 like) (SS016)] [Chromobacterium violaceum ATCC 12472]

VFG041857(gi:34498074) [cviB] cell invasion protein [Cpi-1a + Cpi-1 (SPI-1 like) (SS016)] [Chromobacterium violaceum ATCC 12472]

VFG041881(gi:34498047) [cpbD] carbohydrate-binding protein [Cpi-2 encoded T3SS (SPI-2 like) (SS013)] [Chromobacterium violaceum ATCC 12472]

VFG041902(gi:34497876) [cpfI] cell invasion protein - cytoplasmic [Cpi-1a + Cpi-1 (SPI-1 like) (SS016)] [Chromobacterium violaceum ATCC 12472]

VFG042099(gi:3475322) [mfeG361] hypothetical protein [T3SS [SS026]] [Mesorhizobium loti MAFF303099]

VFG042228(gi:82470754) [AB877406] unknown [T3SS [SS007]] [Pantoea stewartii subsp. stewartii str. SS104]

VFG042313(gi:17673947) [STM0570] outer membrane esterase [ApoE [SS104]] [Salmonella enterica subsp. enterica serovar Typhimurium str. LT2]

VFG042316(gi:34497372) [CV\_1917] hemolysin activator protein [ShIA-ShIB [SS143]] [Chromobacterium violaceum ATCC 12472]

VFG042317(gi:34497373) [CV\_1918] hemolysin [ShIA-ShIB [SS143]] [Chromobacterium violaceum ATCC 12472]

VFG042569(gi:26247121) [focO] putative regulatory protein [F1C pilI [A1043]] [Escherichia coli CFT073]

VFG042619(gi:197284434) [ucaA] major fimbrial subunit [uroepithelial cell adhesion (UCA) [A1071]] [Proteus mirabilis HI4320]

VFG042633(gi:15042709) [mrfC] MrfC [mannose-resistant fimbriae, mrf [A1073]] [Photobacterium luminescens str. K122]

VFG042701(gi:15599279) [cupB3] usher CupB3 [CupB fimbriae [A1066]] [Pseudomonas aeruginosa PAO1]

VFG042736(gi:15599658) [rpoN] RNA polymerase factor sigma-54 [type IV pili [A1097]] [Pseudomonas aeruginosa PAO1]

VFG042739(gi:15600525) [crcC] catabolite repression control protein [type IV pili [A1097]] [Pseudomonas aeruginosa PAO1]

VFG042789(gi:215276199) [bfpD] nucleotide binding protein [bundle-forming pili, Bfp [A1011]] [Escherichia coli O127:H6 str. E2348/69]

VFG042931(gi:146329004) [cpfI] cell invasion protein - cytoplasmic [Cpi-1a + Cpi-1 (SPI-1 like) (SS016)] [Chromobacterium violaceum ATCC 12472]

VFG042955(gi:28199570) [pilM] fimbrial assembly membrane protein [type IV pili [A1181]] [Xylella fastidiosa Temecula1]

VFG043018(gi:15598545) [cheV] chemotaxis protein [Deoxyhexose linking sugar, 209 Da capping structure [A1138]] [Pseudomonas aeruginosa PAO1]

VFG043018(gi:15598545) [cheV] chemotaxis protein [Deoxyhexose linking sugar, 209 Da capping structure [A1138]] [Pseudomonas aeruginosa PAO1]

VFG043028(gi:17674536) [flgH] flagellar basal body L-ring protein [peritrichous flagella [A1139]] [Salmonella enterica subsp. enterica serovar Typhimurium str. LT2]

VFG043039(gi:17676260) [cheR] chemotaxis methyltransferase CheR [peritrichous flagella [A1139]] [Salmonella enterica subsp. enterica serovar Typhimurium str. LT2]

VFG043041(gi:17676262) [cheW] purine-binding chemotaxis protein [peritrichous flagella [A1139]] [Salmonella enterica subsp. enterica serovar Typhimurium str. LT2]

VFG043047(gi:17676292) [flvY] cystine transporter subunit [peritrichous flagella [A1139]] [Salmonella enterica subsp. enterica serovar Typhimurium str. LT2]

VFG043047(gi:17676292) [flvY] cystine transporter subunit [peritrichous flagella [A1139]] [Salmonella enterica subsp. enterica serovar Typhimurium str. LT2]

VFG043066(gi:17676317) [flpI] flagellar biosynthesis protein FlpI [peritrichous flagella [A1139]] [Salmonella enterica subsp. enterica serovar Typhimurium str. LT2]

VFG043099(gi:15802355) [flvY] cystine transporter subunit [peritrichous flagella [A1140]] [Escherichia coli O157:H7 str. EDL933]

VFG043099(gi:15802355) [flvY] cystine transporter subunit [peritrichous flagella [A1140]] [Escherichia coli O157:H7 str. EDL933]

VFG043099(gi:15802355) [flvY] cystine transporter subunit [peritrichous flagella [A1140]] [Escherichia coli O157:H7 str. EDL933]

VFG043103(gi:15802359) [flvI] flagellar capping protein [peritrichous flagella [A1140]] [Escherichia coli O157:H7 str. EDL933]

VFG043113(gi:15802379) [flvI] flagellar basal body-associated protein FlvI [peritrichous flagella [A1140]] [Escherichia coli O157:H7 str. EDL933]

VFG043131(gi:28900123) [flgF] putative flagellar basal-body rod protein [lateral flagella [A1142]] [Vibrio parahaemolyticus RIMD 2210633]

VFG043133(gi:28900125) [flgH] flagellar basal body L-ring protein [lateral flagella [A1142]] [Vibrio parahaemolyticus RIMD 2210633]

VFG043136(gi:28900128) [flgK] putative flagellar hook-associated protein [lateral flagella [A1142]] [Vibrio parahaemolyticus RIMD 2210633]

VFG043137(gi:28900129) [flgL] flagellar hook-associated protein FlgI [lateral flagella [A1142]] [Vibrio parahaemolyticus RIMD 2210633]

VFG043146(gi:28901391) [flfI] flagellar MS-ring protein [lateral flagella [A1142]] [Vibrio parahaemolyticus RIMD 2210633]

VFG043152(gi:28901397) [flpI] flagellar biosynthesis protein FlpI [lateral flagella [A1142]] [Vibrio parahaemolyticus RIMD 2210633]

VFG043157(gi:28901403) [lafA] lateral flagellin LafA [lateral flagella [A1142]] [Vibrio parahaemolyticus RIMD 2210633]

VFG043158(gi:28901405) [lafB] flagellar distal capping protein LafB [lateral flagella [A1142]] [Vibrio parahaemolyticus RIMD 2210633]

VFG043159(gi:28901406) [lafC] LaC protein [lateral flagella [A1142]] [Vibrio parahaemolyticus RIMD 2210633]

VFG043164(gi:28901411) [motA] flagellar motor protein MotA [lateral flagella [A1142]] [Vibrio parahaemolyticus RIMD 2210633]

VFG043165(gi:28901412) [lafU] flagellar motor switch protein LafU [lateral flagella [A1142]] [Vibrio parahaemolyticus RIMD 2210633]

VFG043167(gi:74101639) [flhN] FlhN [ND [A1143]] [Aeromonas hydrophila str. AH-3]

VFG043172(gi:74101644) [flhA] FlhA [ND [A1143]] [Aeromonas hydrophila str. AH-3]

VFG043183(gi:74101655) [flgB] FlgB [ND [A1143]] [Aeromonas hydrophila str. AH-3]

VFG043184(gi:74101656) [flgC] FlgC [ND [A1143]] [Aeromonas hydrophila str. AH-3]

VFG043186(gi:74101658) [flgE] FlgE [ND [A1143]] [Aeromonas hydrophila str. AH-3]

VFG043206(gb|YP\_001006774) [cheY] chemotaxis regulatory protein CheY [peritrichous flagella [A1145]] [Yersinia enterocolitica subsp. enterocolitica 8081]

VFG043207(gb|YP\_001006775) [cheB] chemotaxis-specific methyltransferase CheB [peritrichous flagella [A1145]] [Yersinia enterocolitica subsp. enterocolitica 8081]

VFG043207(gb|YP\_001006775) [cheB] chemotaxis-specific methyltransferase CheB [peritrichous flagella [A1145]] [Yersinia enterocolitica subsp. enterocolitica 8081]

VFG043211(gb|YP\_001006780) [cheA] chemotaxis protein CheA [peritrichous flagella [A1145]] [Yersinia enterocolitica subsp. enterocolitica 8081]

VFG043211(gb|YP\_001006780) [cheA] chemotaxis protein CheA [peritrichous flagella [A1145]] [Yersinia enterocolitica subsp. enterocolitica 8081]

VFG043212(gb|YP\_001006781) [motB] flagellar motor protein MotB [peritrichous flagella [A1145]] [Yersinia enterocolitica subsp. enterocolitica 8081]

VFG043214(gi:218927893) [flhB] flagellar biosynthesis protein FlhB [lateral flagella [A1146]] [Yersinia pestis CO92]

VFG043214(gi:218927893) [flhB] flagellar biosynthesis protein FlhB [lateral flagella [A1146]] [Yersinia pestis CO92]

VFG043224(gi:218927903) [flhH] flagellar assembly protein H [lateral flagella [A1146]] [Yersinia pestis CO92]

VFG043225(gi:218927904) [flhI] flagellum-specific ATP synthase [lateral flagella [A1146]] [Yersinia pestis CO92]

VFG043229(gi:218927911) [flgD] flagellar basal body rod modification protein [lateral flagella [A1146]] [Yersinia pestis CO92]

VFG043231(gi:218927914) [flgG] flagellar basal body rod protein FlgG [lateral flagella [A1146]] [Yersinia pestis CO92]

VFG043233(gi:218927916) [flgI] flagellar basal body P-ring protein [lateral flagella [A1146]] [Yersinia pestis CO92]

VFG043244(gi:218927931) [flhA] flagellar biosynthesis sigma factor [lateral flagella [A1146]] [Yersinia pestis CO92]

VFG043297(gi:126697822) [flhI] flagellum-specific ATP synthase [HexNAc [A1148]] [Clostridium difficile 630]

VFG043435(gb|YP\_095788) [fler/flrC] sigma 54-dependent response regulator [polar flagella [A1149]] [Legionella pneumophila subsp. pneumophila str. Philadelphia 1]

c\_amazonense.gapfilled\_200\_mauve.fasta.99

c\_amazonense.gapfilled\_200\_mauve.fasta.773

c\_amazonense.gapfilled\_200\_mauve.fasta.774

c\_amazonense.gapfilled\_200\_mauve.fasta.779

c\_amazonense.gapfilled\_200\_mauve.fasta.780

c\_amazonense.gapfilled\_200\_mauve.fasta.772

c\_amazonense.gapfilled\_200\_mauve.fasta.777

c\_amazonense.gapfilled\_200\_mauve.fasta.786

c\_amazonense.gapfilled\_200\_mauve.fasta.791

c\_amazonense.gapfilled\_200\_mauve.fasta.2600

c\_amazonense.gapfilled\_200\_mauve.fasta.2601

c\_amazonense.gapfilled\_200\_mauve.fasta.4268

c\_amazonense.gapfilled\_200\_mauve.fasta.302

c\_amazonense.gapfilled\_200\_mauve.fasta.2666

c\_amazonense.gapfilled\_200\_mauve.fasta.2667

c\_amazonense.gapfilled\_200\_mauve.fasta.2668

c\_amazonense.gapfilled\_200\_mauve.fasta.2669

c\_amazonense.gapfilled\_200\_mauve.fasta.2671

c\_amazonense.gapfilled\_200\_mauve.fasta.2670

c\_amazonense.gapfilled\_200\_mauve.fasta.2675

c\_amazonense.gapfilled\_200\_mauve.fasta.2672

c\_amazonense.gapfilled\_200\_mauve.fasta.2677

c\_amazonense.gapfilled\_200\_mauve.fasta.2676

c\_amazonense.gapfilled\_200\_mauve.fasta.2680

c\_amazonense.gapfilled\_200\_mauve.fasta.2679

c\_amazonense.gapfilled\_200\_mauve.fasta.2657

c\_amazonense.gapfilled\_200\_mauve.fasta.2684

c\_amazonense.gapfilled\_200\_mauve.fasta.2682

c\_amazonense.gapfilled\_200\_mauve.fasta.2683

c\_amazonense.gapfilled\_200\_mauve.fasta.2681

c\_amazonense.gapfilled\_200\_mauve.fasta.2687

c\_amazonense.gapfilled\_200\_mauve.fasta.2686

c\_amazonense.gapfilled\_200\_mauve.fasta.2685

c\_amazonense.gapfilled\_200\_mauve.fasta.2689

c\_amazonense.gapfilled\_200\_mauve.fasta.2665

c\_amazonense.gapfilled\_200\_mauve.fasta.2664

c\_amazonense.gapfilled\_200\_mauve.fasta.2662

c\_amazonense.gapfilled\_200\_mauve.fasta.2663

c\_amazonense.gapfilled\_200\_mauve.fasta.2657

c\_amazonense.gapfilled\_200\_mauve.fasta.2658

c\_amazonense.gapfilled\_200\_mauve.fasta.2660

c\_amazonense.gapfilled\_200\_mauve.fasta.2661

c\_amazonense.gapfilled\_200\_mauve.fasta.2656

c\_amazonense.gapfilled\_200\_mauve.fasta.2655

c\_amazonense.gapfilled\_200\_mauve.fasta.2654

c\_amazonense.gapfilled\_200\_mauve.fasta.4209

c\_amazonense.gapfilled\_200\_mauve.fasta.650

c\_amazonense.gapfilled\_200\_mauve.fasta.1878

c\_amazonense.gapfilled\_200\_mauve.fasta.734

c\_amazonense.gapfilled\_200\_mauve.fasta.1873

c\_amazonense.gapfilled\_200\_mauve.fasta.1870

c\_amazonense.gapfilled\_200\_mauve.fasta.1869

c\_amazonense.gapfilled\_200\_mauve.fasta.1853

c\_amazonense.gapfilled\_200\_mauve.fasta.1852

c\_amazonense.gapfilled\_200\_mauve.fasta.1851

c\_amazonense.gapfilled\_200\_mauve.fasta.1847

c\_amazonense.gapfilled\_200\_mauve.fasta.1844

c\_amazonense.gapfilled\_200\_mauve.fasta.1845

c\_amazonense.gapfilled\_200\_mauve.fasta.1846

c\_amazonense.gapfilled\_200\_mauve.fasta.1843

c\_amazonense.gapfilled\_200\_mauve.fasta.1842

c\_amazonense.gapfilled\_200\_mauve.fasta.443

c\_amazonense.gapfilled\_200\_mauve.fasta.1928

c\_amazonense.gapfilled\_200\_mauve.fasta.673

c\_amazonense.gapfilled\_200\_mauve.fasta.1260

c\_amazonense.gapfilled\_200\_mauve.fasta.882

c\_amazonense.gapfilled\_200\_mauve.fasta.2325

c\_amazonense.gapfilled\_200\_mauve.fasta.2324

c\_amazonense.gapfilled\_200\_mauve.fasta.621

c\_amazonense.gapfilled\_200\_mauve.fasta.3130

c\_amazonense.gapfilled\_200\_mauve.fasta.3122

c\_amazonense.gapfilled\_200\_mauve.fasta.3128

c\_amazonense.gapfilled\_200\_mauve.fasta.2904

c\_amazonense.gapfilled\_200\_mauve.fasta.3746

c\_amazonense.gapfilled\_200\_mauve.fasta.1861

c\_amazonense.gapfilled\_200\_mauve.fasta.2120

c\_amazonense.gapfilled\_200\_mauve.fasta.678

c\_amazonense.gapfilled\_200\_mauve.fasta.2472

c\_amazonense.gapfilled\_200\_mauve.fasta.2597

c\_amazonense.gapfilled\_200\_mauve.fasta.2355

c\_amazonense.gapfilled\_200\_mauve.fasta.1810

c\_amazonense.gapfilled\_200\_mauve.fasta.1811

c\_amazonense.gapfilled\_200\_mauve.fasta.2518

c\_amazonense.gapfilled\_200\_mauve.fasta.711

c\_amazonense.gapfilled\_200\_mauve.fasta.2557

c\_amazonense.gapfilled\_200\_mauve.fasta.2114

c\_amazonense.gapfilled\_200\_mauve.fasta.2931

c\_amazonense.gapfilled\_200\_mauve.fasta.2146

c\_amazonense.gapfilled\_200\_mauve.fasta.1778

c\_amazonense.gapfilled\_200\_mauve.fasta.2561

c\_amazonense.gapfilled\_200\_mauve.fasta.2809

c\_amazonense.gapfilled\_200\_mauve.fasta.2807

c\_amazonense.gapfilled\_200\_mauve.fasta.2804

c\_amazonense.gapfilled\_200\_mauve.fasta.2803

c\_amazonense.gapfilled\_200\_mauve.fasta.2440

c\_amazonense.gapfilled\_200\_mauve.fasta.2444

c\_amazonense.gapfilled\_200\_mauve.fasta.2452

c\_amazonense.gapfilled\_200\_mauve.fasta.2435

c\_amazonense.gapfilled\_200\_mauve.fasta.2434

c\_amazonense.gapfilled\_200\_mauve.fasta.2429

c\_amazonense.gapfilled\_200\_mauve.fasta.2438

c\_amazonense.gapfilled\_200\_mauve.fasta.2443

c\_amazonense.gapfilled\_200\_mauve.fasta.2448

c\_amazonense.gapfilled\_200\_mauve.fasta.2813

c\_amazonense.gapfilled\_200\_mauve.fasta.2812

c\_amazonense.gapfilled\_200\_mauve.fasta.2810

c\_amazonense.gapfilled\_200\_mauve.fasta.2999

c\_amazonense.gapfilled\_200\_mauve.fasta.1809

c\_amazonense.gapfilled\_200\_mauve.fasta.894

c\_amazonense.gapfilled\_200\_mauve.fasta.1813

c\_amazonense.gapfilled\_200\_mauve.fasta.899

c\_amazonense.gapfilled\_200\_mauve.fasta.1558

c\_amazonense.gapfilled\_200\_mauve.fasta.2447

c\_amazonense.gapfilled\_200\_mauve.fasta.2439

c\_amazonense.gapfilled\_200\_mauve.fasta.2438

c\_amazonense.gapfilled\_200\_mauve.fasta.2437

c\_amazonense.gapfilled\_200\_mauve.fasta.2811

c\_amazonense.gapfilled\_200\_mauve.fasta.2808

c\_amazonense.gapfilled\_200\_mauve.fasta.2806

c\_amazonense.gapfilled\_200\_mauve.fasta.2430

c\_amazonense.gapfilled\_200\_mauve.fasta.549

c\_amazonense.gapfilled\_200\_mauve.fasta.767



[illegible]
